# Supplementary material for: Direct RNA Nanopore Sequencing of Pseudomonas aeruginosa Clone C Transcriptomes
Source: PubMed Central journal article supplement (PMC8765398; doi:10.1128/jb.00418-21), 2022-01-18
Supplement: jb.00418-21-s0001.pdf [file jb.00418-21-s0001.pdf]

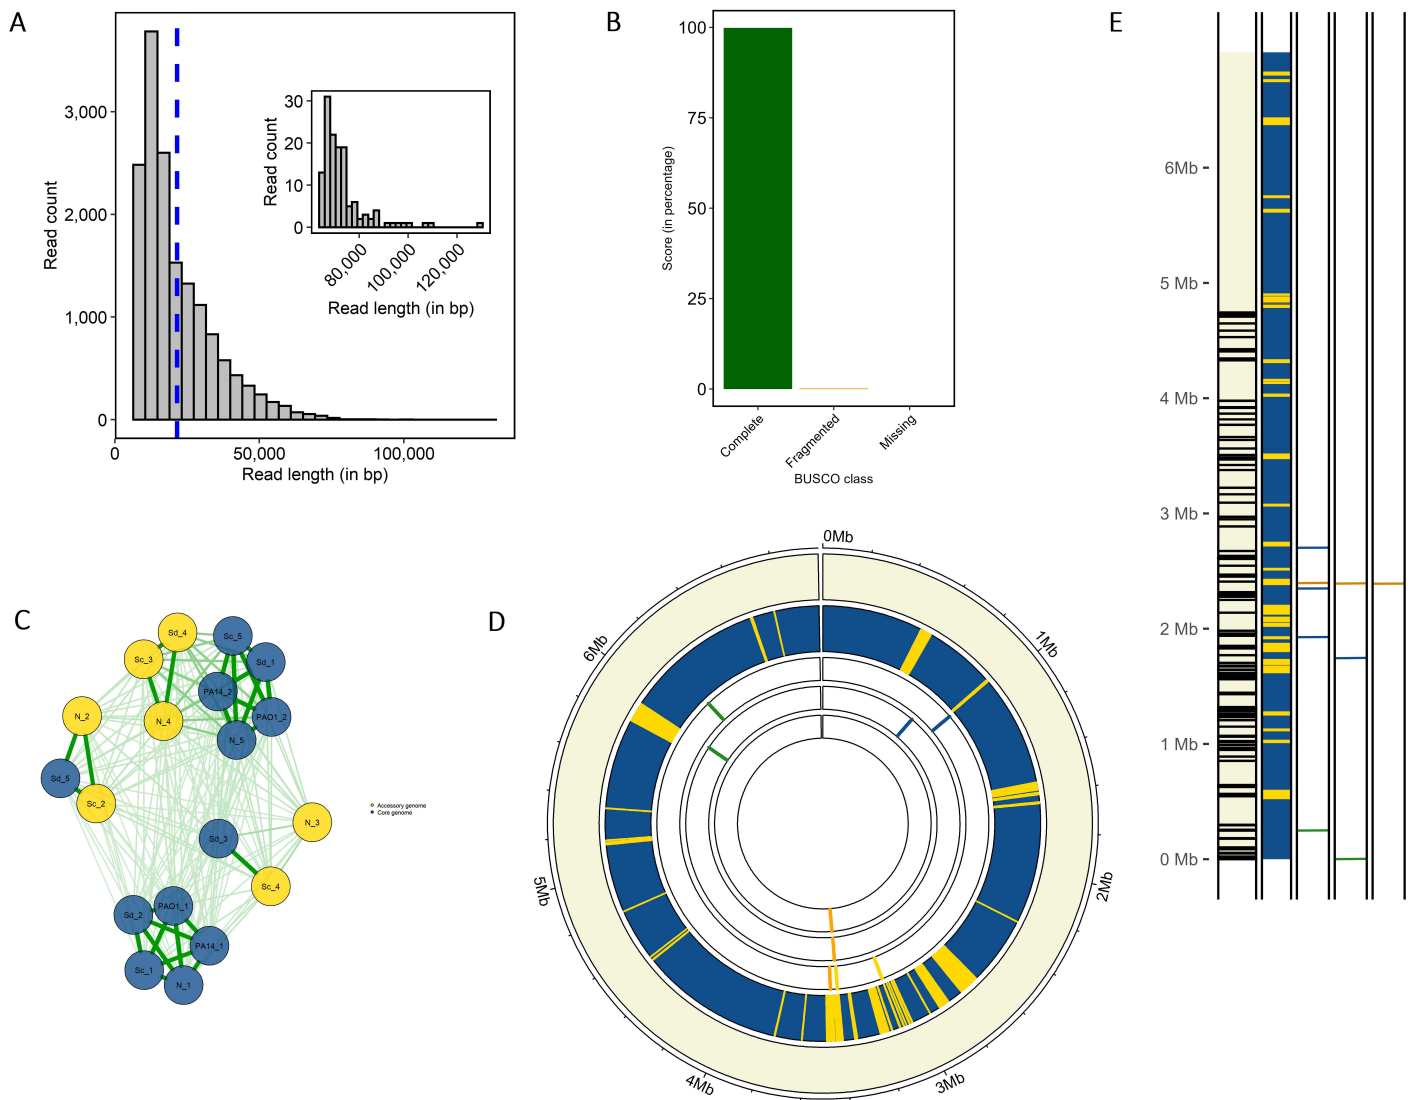

**Supplementary Figure S1. The *P. aeruginosa* SG17M genome. (A) Evaluation of the SG17M genome assembly with flye.** For the *de novo* assembly procedure only nanopore DNA reads of the SG17M strain with a minimum read length of 8,000 bp were selected. **(B)** After polishing the circular contig with paired-end Illumina reads, a BUSCO completeness score of 99.9 % was obtained. **(C) Network analysis of the sequence similarity** of *ftsH* observed in the following *P. aeruginosa* genomes: SG17M complete (SG17Mc), SG17M draft (SG17Md), NN2 (N2), PAO1 and PA14. The blue and yellow color represent *ftsH* gene locations in the core and accessory genome, respectively. **(D, E)** Structural overview of the publicly available and the newly generated SG17M reference DNA sequence. **(E)** Illustration of the linear SG17M draft and **(D)** the circularized complete genome. The left or in case of the circular genome the outer lane (beige) show the number and distribution of observed assembly gaps (black) in the genome structure. The second lane/inner circle (blue) visualizes the accessory genome (yellow) as predicted with IslandViewer4 (51). The third lane/inner circle provides information on the genome positions of *ftsH* genes in the core (green or blue) or accessory (yellow or orange) genome. The green and orange *ftsH* position correspond to the previously reported locations of the two clone C specific *ftsH* genes in the core and accessory genome, respectively. The two *ftsH* genes exhibit a sequence similarity of 45 % (36). The fourth lane/inner circle represents the genome positions of the detected core *clpG* gene (green), the accessory *clpG<sub>GI</sub>* gene (orange) and *clpB* (blue). The fifth lane/innermost circle shows the map position of the heat shock gene *shscp20c*.

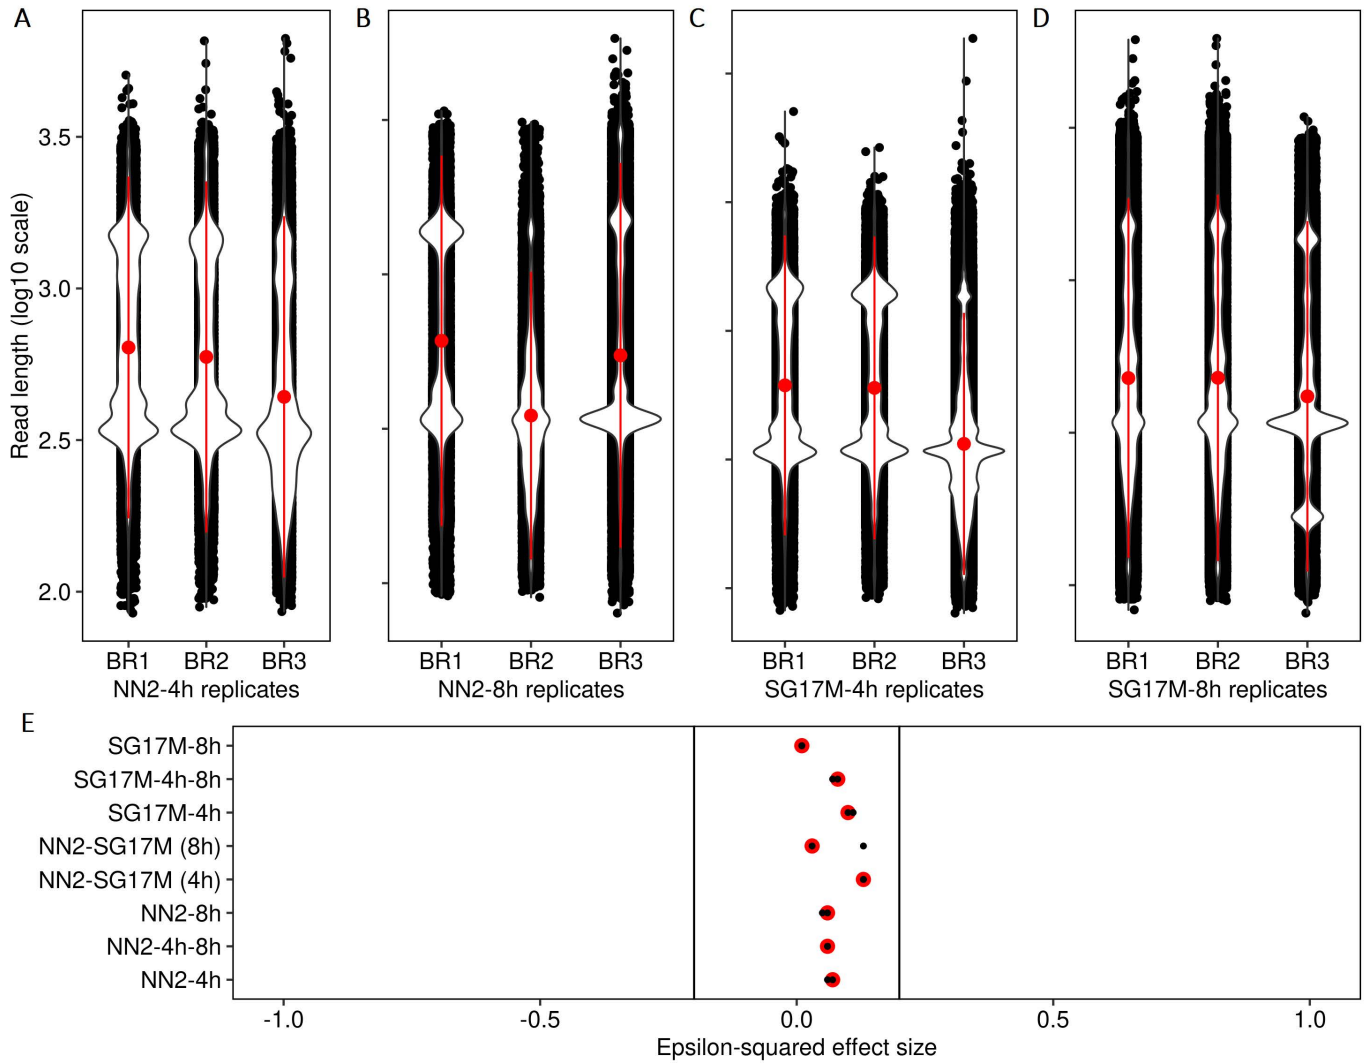

**Supplementary Figure S2. Read length comparison between replicates, strains and time points.** **(A)** Comparison between NN2 replicates at the mid-exponential (4h) growth phase. **(B)** Comparison between NN2 replicates at the early-stationary growth phase. **(C)** Comparison between SG17M replicates at the mid-exponential growth phase. **(D)** Comparison between SG17M replicates at the early-stationary growth phase. **(A) – (D)** The red dot and red lines reveal the mean and standard deviation. **(E)** The epsilon-squared effect size was always below 0.2, indicating none or only small variations in read length. The red dot represents the confidence intervals of the effect size.

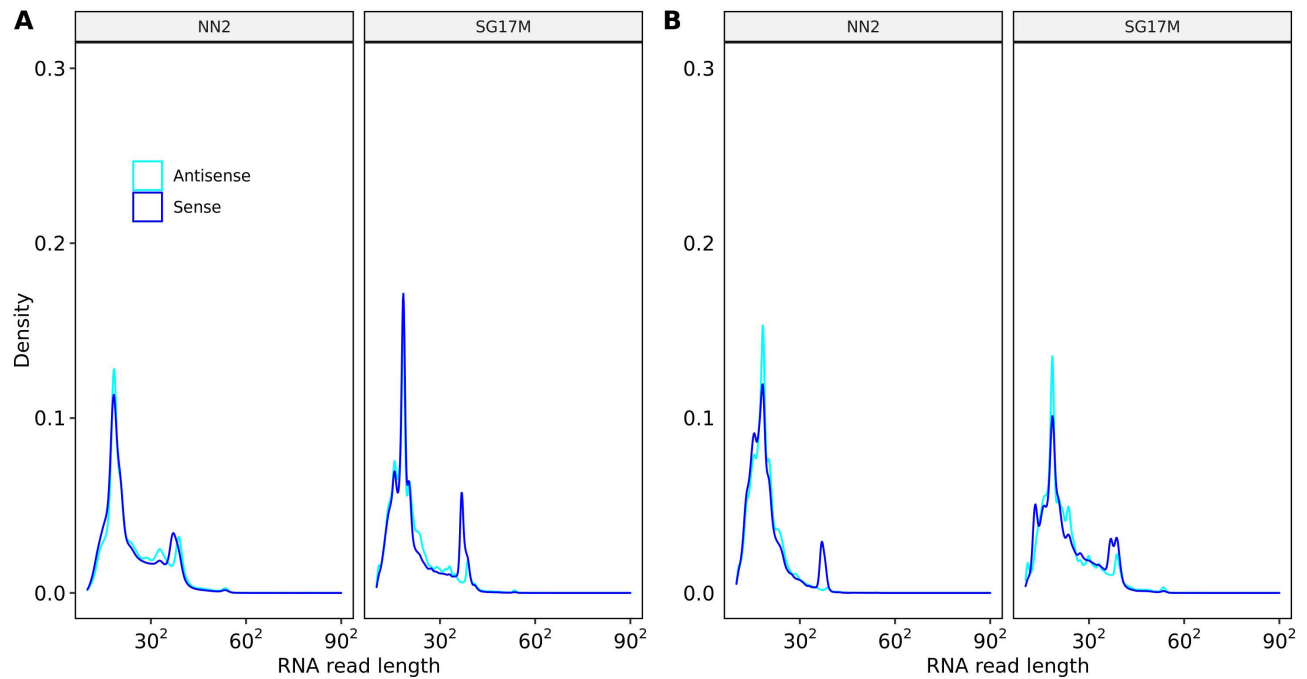

**Supplementary Figure S3. Read length distribution between sense and antisense transcripts.** (A) Comparison of sense and antisense transcript length at the mid-exponential phase in NN2 and SG17M. The observed difference in terms of effect size was neglectable (NN2: Wilcoxon  $r = 0.04$  [0.02-0.06]; SG17M: Wilcoxon  $r = 0.03$  [0.01-0.05]). (B) Comparison of sense and antisense transcript length at the early-stationary growth phase in NN2 and SG17M. The observed difference in terms of effect size was neglectable (NN2: Wilcoxon  $r = 0.05$  [0.03-0.07]; SG17M: Wilcoxon  $r = 0.03$  [0.0-0.04]).

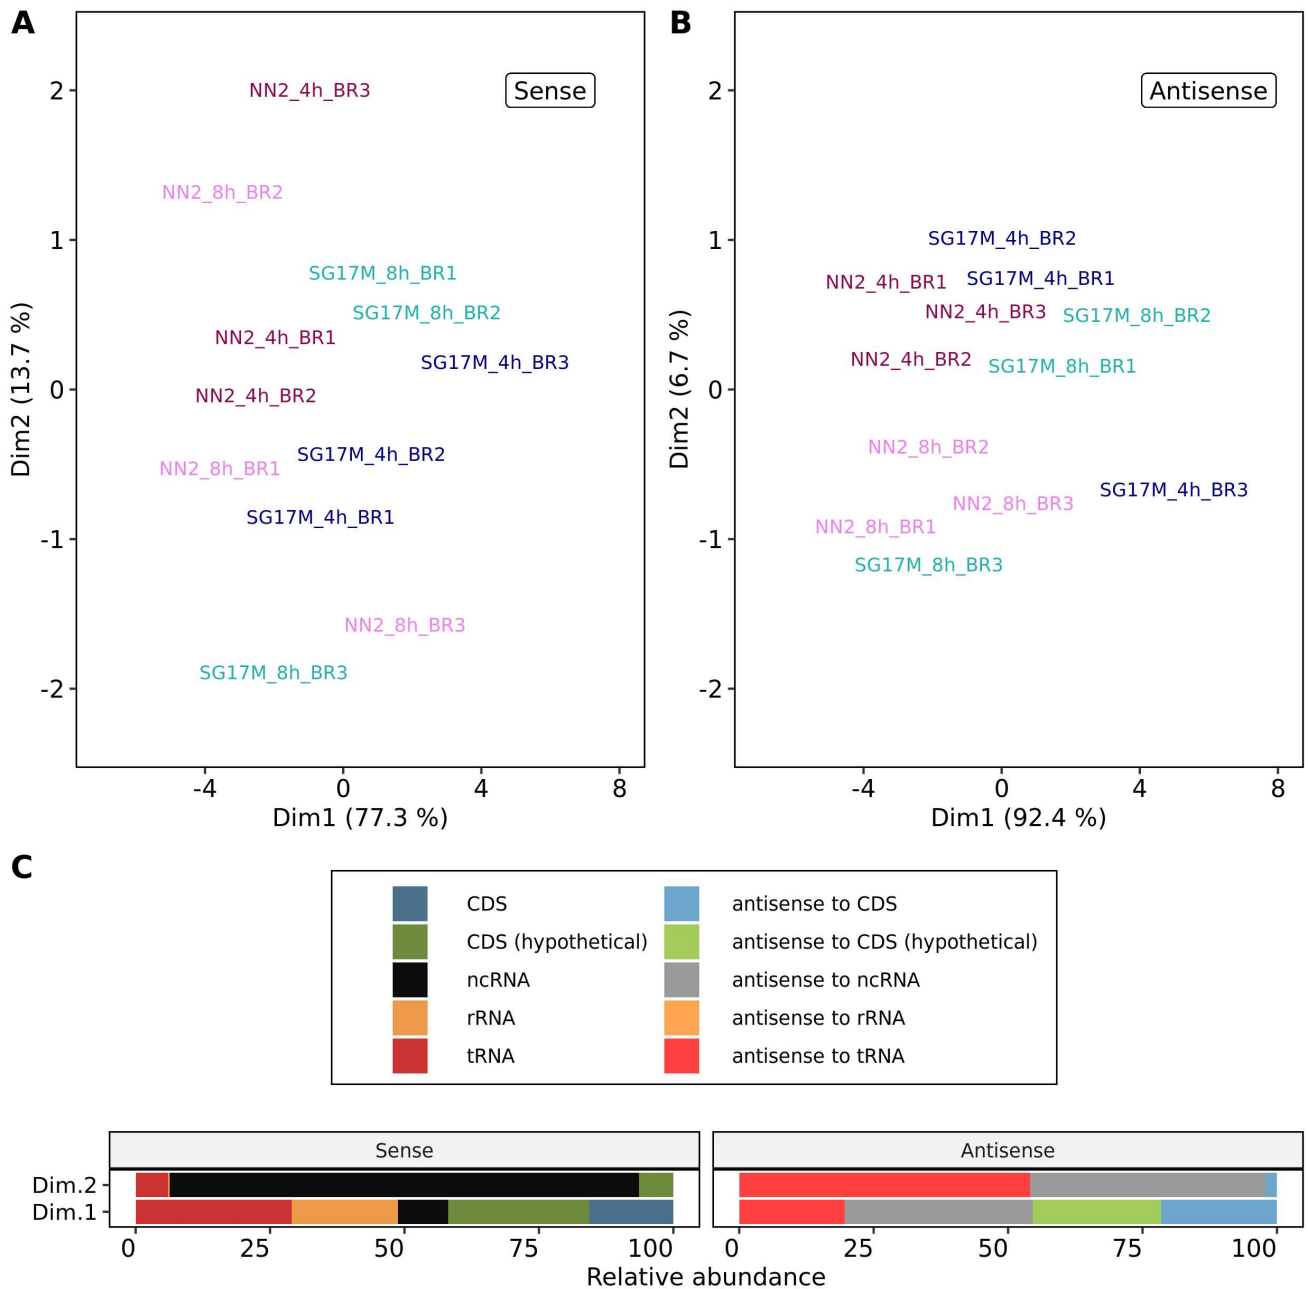

**Supplementary Figure S4. Principal component analysis (PCA) for investigating the observed variance in sense (left) and antisense (right) transcript alignments to five genomic features between biological replicates. (A) PCA of sense transcript alignments.** No strain- or time-specific signature was apparent. **(B) PCA of antisense transcript alignments.** NN2 replicates cluster close together and NN2 mid-exponential (4h) and early-stationary phase (8h) replicates are clearly separated by the second dimension. **(C) Contribution of variables to the separation** in the first dimension (Dim.1) and second dimension (Dim.2) for sense (left) and antisense (right) transcript alignment. For sense and antisense alignment, more than 50 % of the explained variance in the first dimension is associated with non-coding RNA. However, as shown in Figure 2, only a small proportion of non-coding RNA is found in the antisense read population. For antisense alignment, about 50 % of the observed variance is explained by tRNA and ncRNA pattern. This is what also separates the NN2-mid-exponential samples from the NN2 early-stationary-samples.

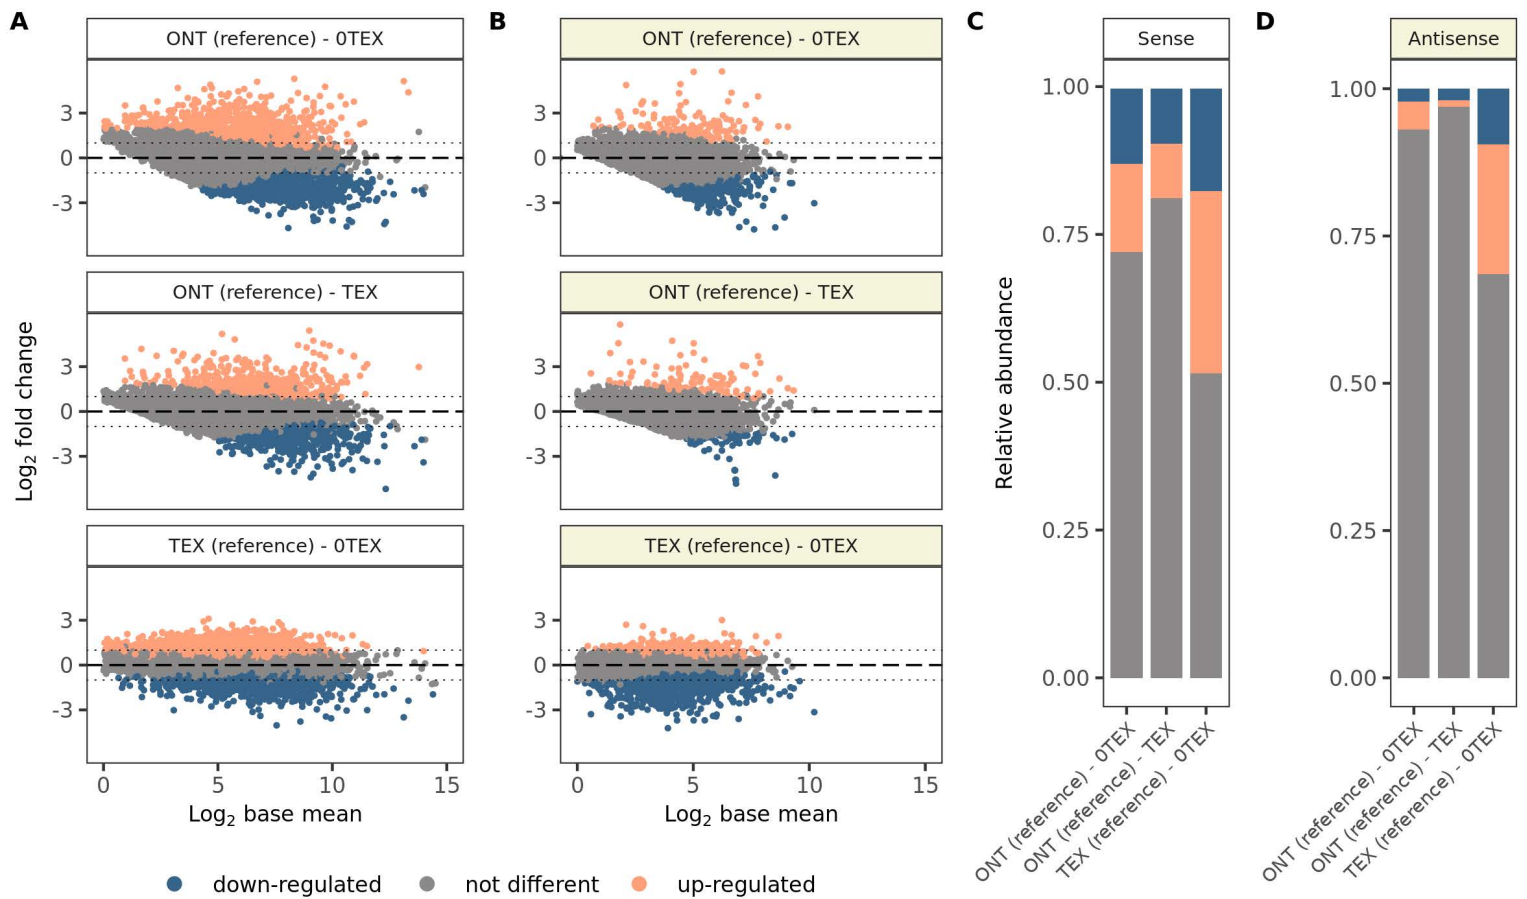

**Supplementary Figure S5. Differential expression analysis between Illumina (TEX, OTEX) and nanopore direct RNA-seq (ONT) data.** (A) Comparison of sense transcription between (upper) ONT-NN2 and OTEX-NN2, (middle) ONT-NN2 and TEX-NN2, (lower) TEX-NN2 and OTEX-NN2. The blue, grey and orange dots represent down-regulated, similarly expressed or upregulated genomic features in ONT-NN2 samples. (B) Comparison of antisense transcription between (upper) ONT-NN2 and OTEX-NN2, (middle) ONT-NN2 and TEX-NN2, (lower) TEX-NN2 and OTEX-NN2. (C) Pairwise comparison of the relative abundance of genomic features characterized as down-regulated, not different and up-regulated in sense transcription. (D) Pairwise comparison of the relative abundance of genomic features characterized as down-regulated, not different and up-regulated in antisense transcription.

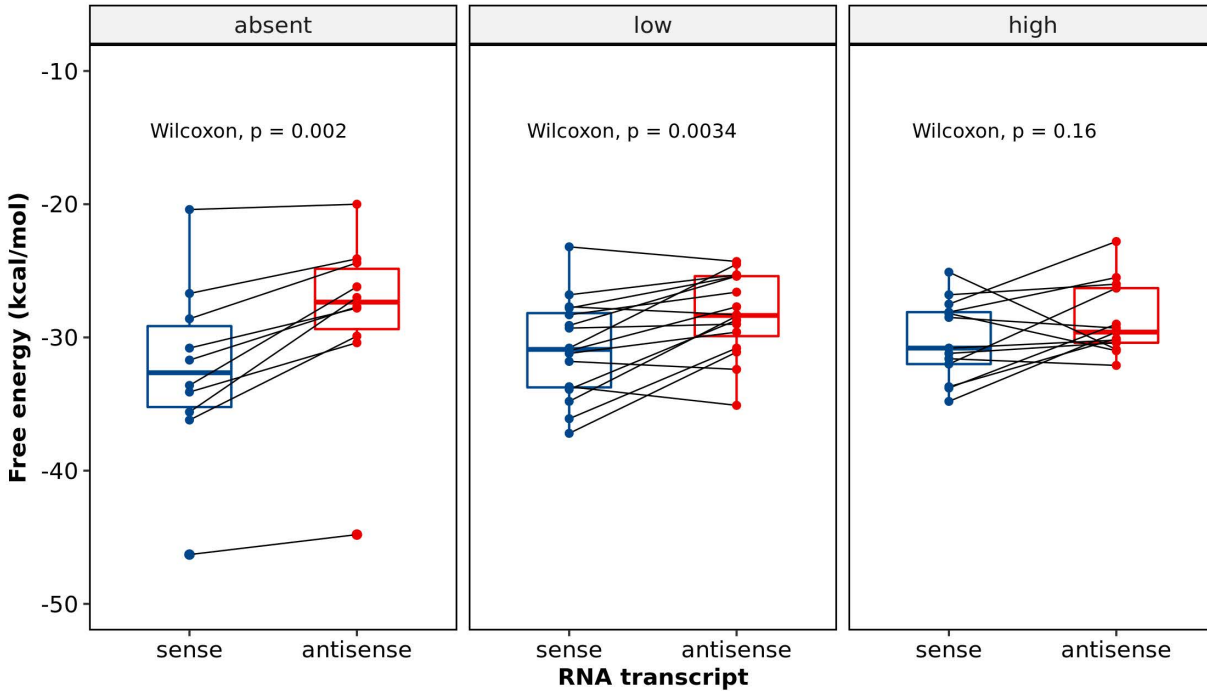

**Supplementary Figure S6. Pairwise comparison of the predicted minimum free energy of folding (MFE) based on Zuker and Stiegler's algorithm (46) between sense-antisense tRNA transcription. (Left box, 'absent')** For 10 tRNA genes, no antisense transcripts were detected. RNAfold was run to obtain the MFE prediction for sense and antisense sequences. In general, the MFE of the predicted sense secondary structure was significantly lower than the MFE of the corresponding antisense structure. **(Centre box, 'low')** For 16 tRNA genes, low antisense transcription was detected (< 10 reads per entity). In this case, the MFE of the predicted sense secondary structure was also typically lower compared to the partner antisense entity. **(Right box, 'high')** 13 high abundant tRNA entities were detected. Here, the MFE of the predicted sense and antisense secondary structure was comparable.

**A) NN2:4721872-4721947 (tRNA-LysTTT)**

5'GGGTCGTTAGCTCAGTCGGTAGAGCAGTTGGCTTTAAACCAATTGGTCGTAGGTTCGAATCCTACAGACCCACCA

**B) NN2:5577611-5577710 (tRNA-LysTTT-pseudo)**

5'**AGCTAAATCGGTACGGGGCTTTAAACCTTCTAGAGAGACCTAGGCCA**TTGTCTTTAAACCAATTGGTCGTAGGTTCGAATCCTACAGACCCACCA

**C) NN2:5704205-5704280 (tRNA-LysTTT)**

5'GGGTCGTTAGCTCAGTCGGTAGAGCAGTTGGCTTTAAACCAATTGGTCGTAGGTTCGAATCCTACAGACCCACCA

**Pseudomonas aeruginosa strain C plasmid pKLC102, complete sequence**

Sequence ID: [AY257538.1](#) Length: 103532 Number of Matches: 1

| Score         | Expect                                                   | Identities    | Gaps      | Strand     |
|---------------|----------------------------------------------------------|---------------|-----------|------------|
| 185 bits(100) | 4e-43                                                    | 100/100(100%) | 0/100(0%) | Plus/Minus |
| Query 1       | AGCTAAATCGGTACGGGGCTTTAAACCTTCTAGAGAGACCTAGGCCAATTGCTTTT | 60            |           |            |
| Sbjct 100     | AGCTAAATCGGTACGGGGCTTTAAACCTTCTAGAGAGACCTAGGCCAATTGCTTTT | 41            |           |            |
| Query 61      | AACCAATTGGTCGTAGGTTTCAATCCTACAGACCCACCA                  | 100           |           |            |
| Sbjct 40      | AACCAATTGGTCGTAGGTTTCAATCCTACAGACCCACCA                  | 1             |           |            |

FASTA searches a protein or DNA sequence data bank version 36.3.8h Aug, 2019. W.R. Pearson & D.J. Lipman PNAS (1988) 85:2444-2448.  
Obtained from <https://blast.ncbi.nlm.nih.gov/Blast.cgi#1992576687> (last accessed 18 October 2021).

**Supplementary Figure S7. Comparison of tRNA-Lys-anticodon-TTT regions in the NN2 genome. (A-C) Location of three Lys-TTT regions in the NN2 genome. A BLAST search of the tRNA-LysTTT-pseudo sequence revealed a match (100 % identity) with the pKLC102 plasmid.**



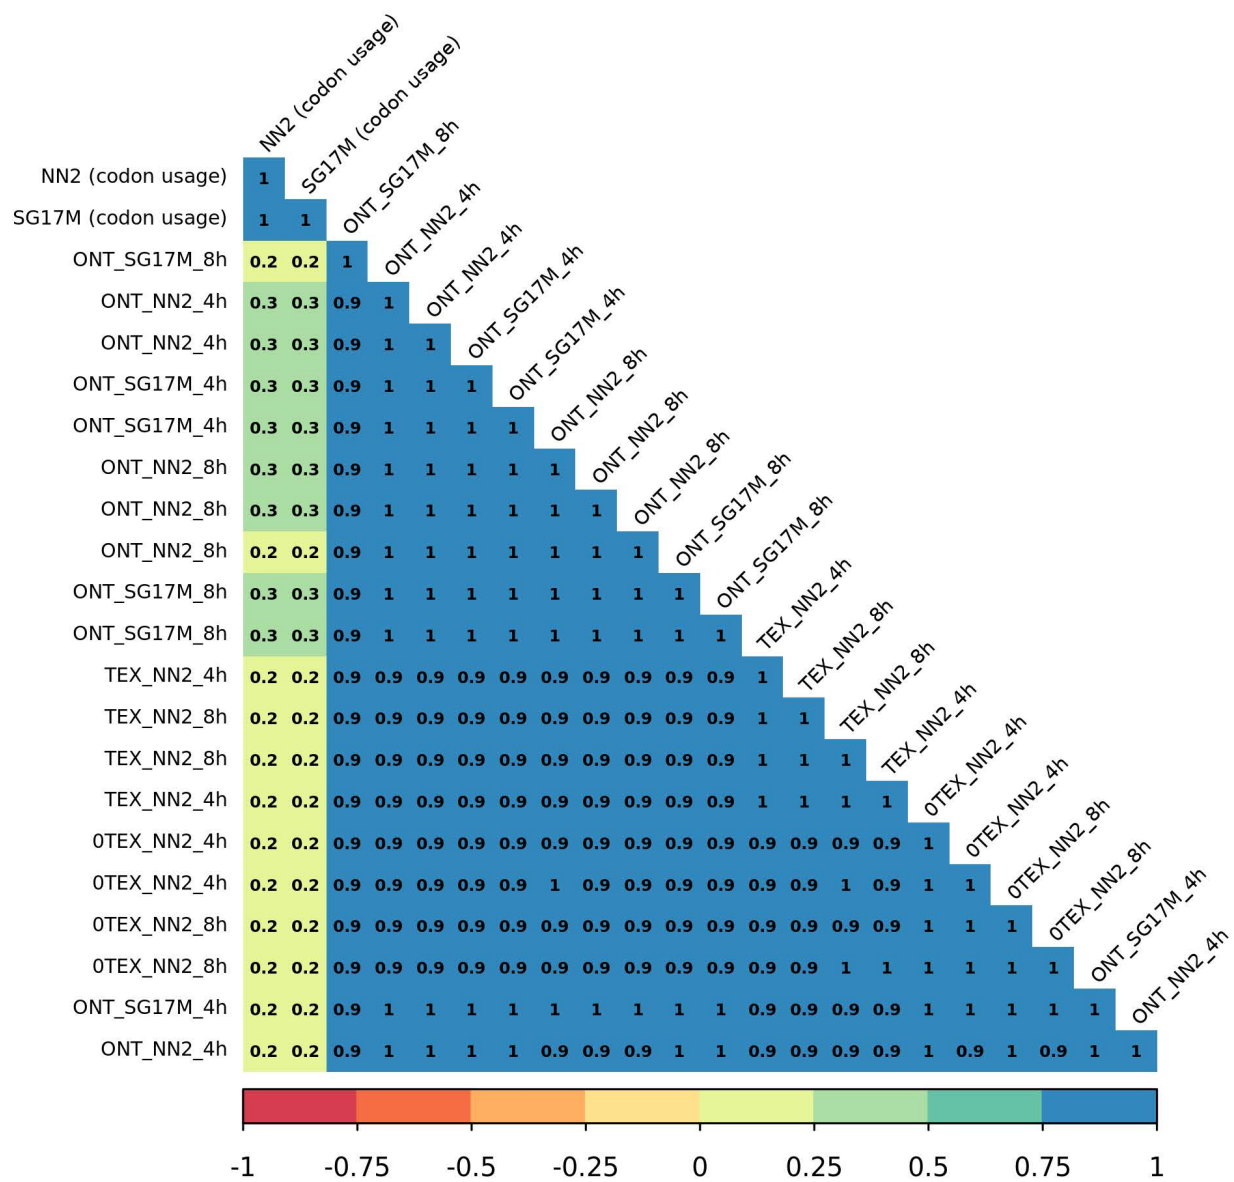

**Supplementary Figure S8. Spearman’s rank-order correlation analysis of the theoretical codon usage** obtained from either the NN2 (NN2 codon usage) or SG17M (SG17M codon usage) genome sequence and tRNA abundance of the biological samples. The numeric Spearman’s rank correlation coefficient (value between -1 and 1) is provided in the plot. The dark blue or dark red color represents a strong positive or a strong negative correlation, respectively.



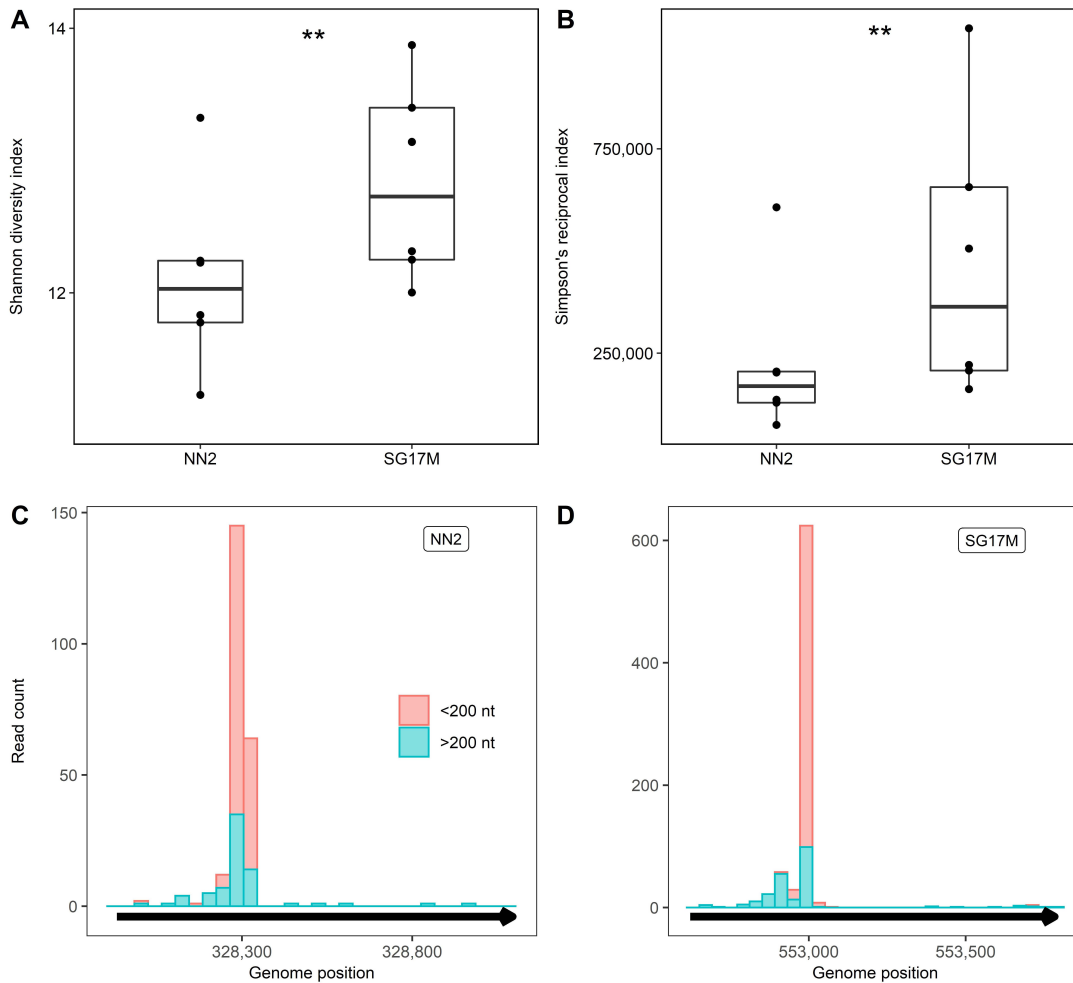

**Supplementary Figure S9. Comparing of the diversity of antisense transcript start positions between NN2 and SG17M. (A)** Shannon diversity of transcript starting sites (Wilcoxon p-value < 0.01, effect size  $r = 0.57$ , CI = 0.24 – 0.8) and **(B)** the Simpson's reciprocal index of starting sites (Wilcoxon p-value < 0.01, effect size  $r = 0.57$ , CI = 0.24 – 0.8) was significantly higher in SG17M compared to NN2, indicating higher diversity of starting sites in SG17M and increased dominance of specific read positions in NN2, respectively. Antisense transcript starting positions within the intQ gene. **(C)** Starting sites observed in NN2 replicates and **(D)** starting sites observed in SG17M replicates.

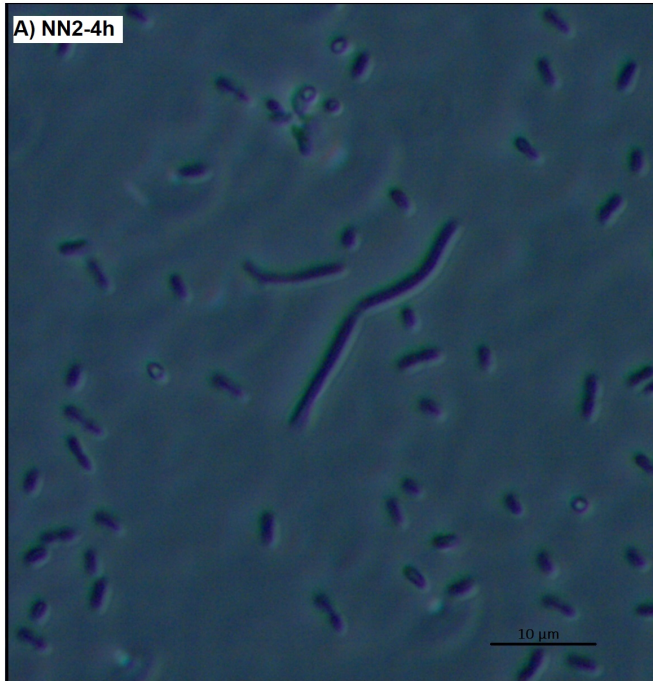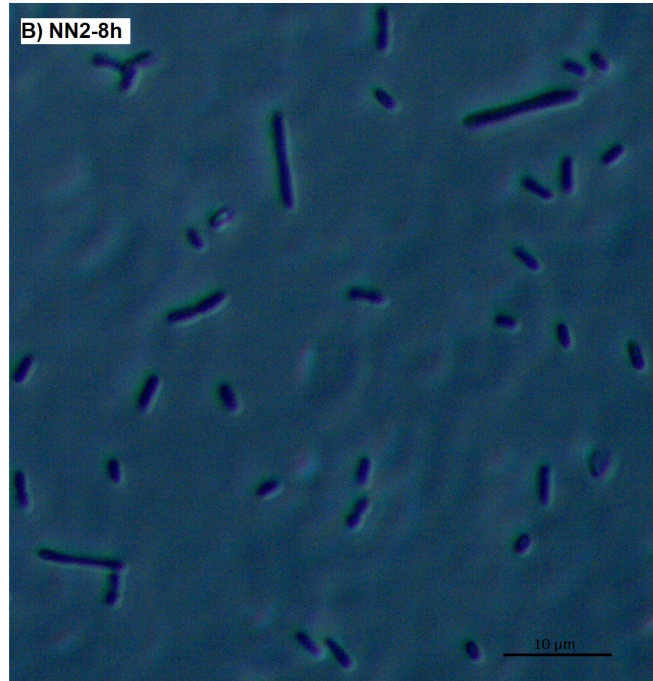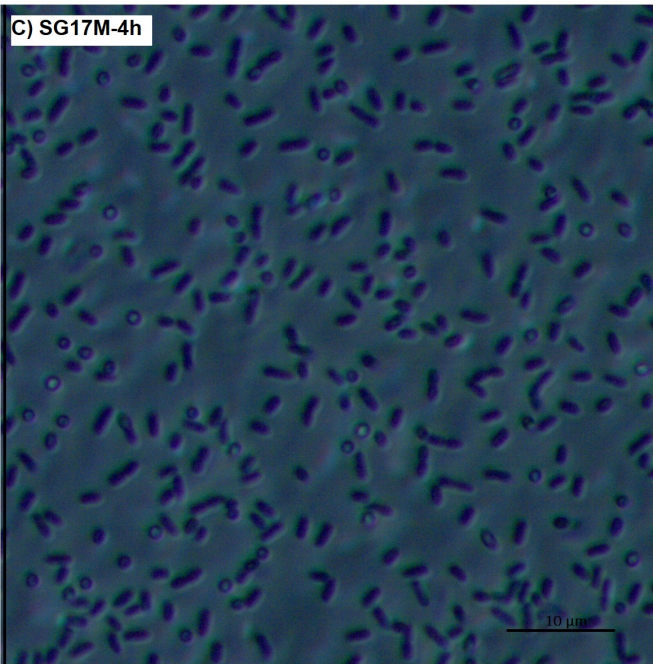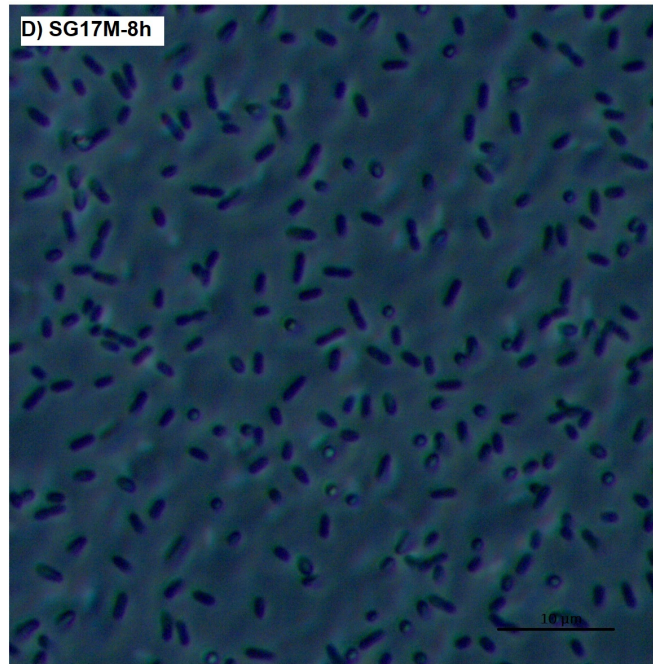

**Supplementary Figure S10. Light microscopy images** of planktonically growing clone C bacteria: (upper left) NN2-mid exponential, (upper right) NN2-early stationary, (lower left) SG17M-mid exponential and (lower right) SG17M-early stationary growth phase.

|                      |     | Bacteria |     |     |     |     |      |     |      |   |
|----------------------|-----|----------|-----|-----|-----|-----|------|-----|------|---|
| 1 <sup>st</sup> Base |     | A        |     | G   |     | U   |      | C   |      |   |
|                      | A   | AAA      | Phe | AGA | Ser | AUA | Tyr  | ACA | Cys  | A |
|                      | G   | GAA      | Phe | GGA | Ser | GUA | Tyr  | GCA | Cys  |   |
|                      | U   | UAA      | Leu | UGA | Ser | UUA | Stop | UCA | Stop |   |
|                      | C   | CAA      | Leu | CGA | Ser | CUA | Stop | CCA | Trp  |   |
|                      | A   | AAG      | Leu | AGG | Pro | AUG | His  | ACG | Arg  | G |
|                      | G   | GAG      | Leu | GGG | Pro | GUG | His  | GCG | Arg  |   |
|                      | U   | UAG      | Leu | UGG | Pro | UUG | Gln  | UCG | Arg  |   |
|                      | C   | CAG      | Leu | CGG | Pro | CUG | Gln  | CCG | Arg  |   |
|                      | A   | AAU      | Ile | AGU | Thr | AUU | Asn  | ACU | Ser  | U |
|                      | G   | GAU      | Ile | GGU | Thr | GUU | Asn  | GCU | Ser  |   |
|                      | U   | UAU      | Ile | UGU | Thr | UUU | Lys  | UCU | Arg  |   |
|                      | C   | CAU      | Met | CGU | Thr | CUU | Lys  | CCU | Arg  |   |
|                      | A   | AAC      | Val | AGC | Ala | AUC | Asp  | ACC | Gly  | C |
|                      | G   | GAC      | Val | GGC | Ala | GUC | Asp  | GCC | Gly  |   |
|                      | U   | UAC      | Val | UGC | Ala | UUC | Glu  | UCC | Gly  |   |
| C                    | CAC | Val      | CGC | Ala | CUC | Glu | CCC  | Gly |      |   |

**Table S1.** This representation of missing tRNA anticodon alternatives was obtained and modified from Figure 2 of Ehrlich et al. (2021). The blue colour depicts missing tRNA isoacceptors as reported by Ehrlich et al. (2021) based on their investigations of more than 100 bacterial species, including Acidobacteria, Actinobacteria, Aquificae, Bacteroidetes, Chlamydiae, Chlorobi, Chloroflexi, Cyanobacteria, Deinococcus-Thermus, Firmicutes, Tenericutes, Thermodesulfobacteria, and Thermotogae phyla. The blue-coloured genes were also missing in *Pseudomonas aeruginosa* NN2 and SG17M reference sequences. Importantly, four other tRNA genes (red colour) were also missing. Please note that Ehrlich and colleagues did not compile data from proteobacteria.

**Supplementary Table S2. Overview of the antisense tRNAs observed in clone C isolates with direct nanopore sequencing.** For the 37 anticodon alternatives (without stop codons, see Supplementary Table 1), antisense tRNA expression was categorised into the following three groups: High expression of antisense tRNA (> 10 reads), low expression of antisense tRNA (< 10 reads) and no expression (< 1 read). The optimal secondary structure of sense tRNAs and their reverse complement sequence (antisense) was predicted with RNAfold 2.4.18 [1]. The minimum free energy of folding (MFE) based on Zuker and Stiegler's algorithm [2], and the ensemble diversity (ED) were calculated. As recently summarised by Sato and colleagues (2021), MFE is based on a thermodynamic model, in which a secondary structure is decomposed into sub-structures (nearest-neighbour loops), including hairpin loops, internal and external loops, or base-pair stacking. The free energy of every decomposed nearest-neighbour loop is calculated and summed to obtain the total free energy of the RNA structure [3]. Finally, the optimal secondary structure is defined by the construct containing the lowest free energy [2, 3]. The ensemble diversity quantifies the similarity of all predicted secondary structures from one sequence by computing pair probabilities [2].

| tRNA gene category | tRNA-anticodon  | transcript-type | MFE (kcal/mol) | ED   | tRNA sequence (5'-3' direction)                                                                    | Secondary structure in dot-bracket notation [1]      |
|--------------------|-----------------|-----------------|----------------|------|----------------------------------------------------------------------------------------------------|------------------------------------------------------|
| high               | Lys-TTT         | sense           | -28.1          | 10.3 | GGGTCGTTAGCTCAGTCGGTAGAGCAGTTGGCTTTAAACCAATTGGTCGTAGGTCGAATCCTACACGACCCACCA                        | ((((((((.....))))))(((.....)))))).....               |
| high               | Lys-TTT-pKLC102 | sense           | -25.1          | 22.5 | AGCTAAATCGGTACGGGCTTTAAACCCCTCCAGTAGAGACACTAGGCCAATTGTCTTTAAACCAATTGGTCGTAGGTCGAATCCTACACGACCCACCA | .....(((.....))))(((((.....))))(((((.....))))))..... |
| high               | Lys-TTT         | antisense       | -25.5          | 4.06 | TGGTGGGTCGTGTAGGATCGAACCTACGACCAATTGGTTAAAGCCAACCTGCTCTACCGACTGAGCTAACGACCC                        | .....(((((((.....)))))).....                         |
| high               | Lys-TTT-pKLC102 | antisense       | -30.9          | 10.4 | TGGTGGGTCGTGTAGGATCGAACCTACGACCAATTGGTTAAAGCCAACCTGCTCTACCGACTGAGCTAACGACCC                        | .....(((((((.....)))))).....                         |
| high               | Thr-TGT         | sense           | -27.5          | 10.6 | GCCGGTATAGCTCAGCTGGTAGAGCACTGACTGTAATCAGTAGGTCGCGGGTTCGACTCTGCTGCCGCGCACCA                         | ((((((((.....))))))(((.....)))).....                 |
| high               | Thr-TGT         | antisense       | -22.8          | 11.5 | TGGTGCCGCCACCGAGTCAACCCGGGACCTACTGATTACAAGTCAGTTGCTCTACCGACTGAGCTAACCGGC                           | .....(((((((.....)))))).....                         |
| high               | Ala-TGC         | sense           | -31.2          | 16.3 | GGGGCCATAGCTCAGCTGGGAGAGCGCCCTGCTTGCACGACGAGGTCAGGAGTTCGATCCTCTGGCTCCACCA                          | ((((((((.....))))))(((.....)))).....                 |
| high               | Ala-TGC         | antisense       | -30.4          | 3.6  | TGGTGGAGCCAAGGAGATCGAACTCCTGACCTCGTGCATGCAAGAGCGCGCTCCACGCTGAGCTATGGCC                             | .....(((((((.....)))))).....                         |
| high               | Ile-GAT         | sense           | -31.6          | 11.1 | GGGTCGTAGCTCAGTTGGTTAGAGCGCACCCCTGATAAGGGTGAAGTTCGCGAGTTCGAATCGCCAGACCCACCA                        | ((((((((.....))))))(((.....)))).....                 |
| high               | Ile-GAT         | antisense       | -32.1          | 1.1  | TGGTGGGTCGGCAGATCGAACTGCCGACCTCACCTTATCAGGGTGCCTCTAACCACTGAGCTACAGACCC                             | .....(((((((.....)))))).....                         |
| high               | Asp-GTC         | sense           | -33.8          | 3.6  | GCAGCGGTAGTTCAGTCGGTTAGAATACCGCCCTGTCACGCGGGGGCGCGGTTGCTGAGTCCGCTCCGCTCGCCA                        | ((((((((.....))))))(((.....)))).....                 |
| high               | Asp-GTC         | antisense       | -29            | 5.8  | TGGCGCAGCGGAGGACTCGAACCCGCGACCCCGCGTGCAGACCGGATTCTAACCGACTGAATACCGCTGC                             | .....(((((((.....)))))).....                         |
| high               | Gly-TCC         | sense           | -28.2          | 4.17 | GCGGGTATAGTTCAGTGTGAGAACTCAGCCTCCAAGCTGATGTCGGTTCGATCCCGCTACCCGCTCCA                               | ((((((((.....))))))(((.....)))).....                 |
| high               | Gly-TCC         | antisense       | -31            | 1.5  | TGGAGCGGTAGCGGAATCGAACCCGCTATCAGCTTGAAGGCTGAGGTTCAACCACTGAATACCCGC                                 | .....(((((((.....)))))).....                         |
| high               | Tyr-GTA         | sense           | -28.5          | 2.6  | GGAGGGATCCGAGTGGCCAAAGGATCAGACTGTAAATCTGACGTCATAGACTCGAAGGTCGAATCCTCTCCCTCCACCA                    | ((((((((.....))))))(((.....)))).....                 |
| high               | Tyr-GTA         | antisense       | -29.3          | 2.1  | TGGTGGAGGGAGAAAGATTGCAACTTCGAACTTGAAGTCTAGACGTCAGATTACAGTCTGATCCTTGGCCACTGGGAATCCCTCC              | .....(((((((.....)))))).....                         |
| high               | Ser-TGA         | sense           | -33.7          | 17.2 | GAGAGTGTGGCCGAGTGGTTAAAGCAACGGTCTGAAAACCGTCGAAGGGGAGACTCTTCGTCGAGTCAATTCACCGCTCCGCA                | ((((((((.....))))))(((.....)))).....                 |
| high               | Ser-TGA         | antisense       | -30.1          | 7.2  | TGGCGGAGGCGGTGAGATCGAACTCAGGAAGAGTCTCCCTTCGACGGTTCGAAAGCGTGCCTAACCACTCGGCCACACTCC                  | ((((((((.....))))))(((.....)))).....                 |
| high               | Pro-TGG         | sense           | -32            | 2.14 | CGGGTATAGCGCAGTCCGGTAGCGCCCTGCTTGGGAGCAGGATGTCGGGAGTTCGAATCTCTACCCGACCA                            | ((((((((.....))))))(((.....)))).....                 |
| high               | Pro-TGG         | antisense       | -26.3          | 12.4 | TGGTGGGGTAGAGAGATCGAACTCCGACATCCTGCTCCAAAGCAGGCGCTACCGACTGCGCTATACCCCG                             | .....(((((((.....)))))).....                         |
| high               | Leu-CAG         | sense           | -34.8          | 7.98 | GCCAGGTGGCGGAATTGGTAGAGCACTAGGTTCAAGGTCAGGTCGCGTGGCAACCGTGAAGTTCGAGTCTCTCTGGGACCA                  | ((((((((.....))))))(((.....)))).....                 |
| high               | Leu-CAG         | antisense       | -29.6          | 4.02 | TGGTGCCAGGAGAAGACTCGAACTCCACGGTGTGCCACCGCTAGGACTGAACCTAGTCGCTCAACATCCGACACTGGGC                    | .....(((((((.....)))))).....                         |
| high               | Asn-GTT         | sense           | -26.8          | 8.4  | TCCGCGATAGCTCAGTCGGTAGAGCAAACTGACTGTAATCATTGGTCCCTGGTTCGAGTCCAGTCCGCGAGCCA                         | ((((((((.....))))))(((.....)))).....                 |
| high               | Asn-GTT         | antisense       | -26            | 2.16 | TGGCTCCGCGACTGGACTCGAACCCAGGACCAATTGAATCAAGTCAATTCCTCTACCGACTGAGCTATCGCGGA                         | .....(((((((.....)))))).....                         |
| high               | Thr-GGT         | sense           | -30.8          | 1    | GCTCATGTAGCTCAGTTGGTAGAGCACACCCCTGGTAAAGGTCAGGTCAGCGGTTCAATCCGCTCATGAGCTCCA                        | ((((((((.....))))))(((.....)))).....                 |
| high               | Thr-GGT         | antisense       | -30.2          | 0.79 | TGGAGCTCATGAGCGGATTTGAACCGCTGACCTCACCTTACCAAGGTCGCTCTACCACTGAGCTACATGAGC                           | .....(((((((.....)))))).....                         |
| low                | Leu-CAA         | sense           | -34.8          | 12   | GCCTCGGTGGCGAATCGGTAGACGCGCGGATCAAAATCCGTTCTGCGCACAGAGTGAAGTTCGAGTCTCTCCGAGGACCA                   | ((((((((.....))))))(((.....)))).....                 |
| low                | Leu-CAA         | antisense       | -28.4          | 5    | TGGTGCCTCGGAGAGACTCGAACTCTCACTCTGCCGCAAGCGGATTTGAATCCCGCGCTACCGACTCCGCCACCGAGC                     | .....(((((((.....)))))).....                         |
| low                | Phe-GAA         | sense           | -36.1          | 1.6  | GCCAGGTAGCTCAGTTGGTAGAGCAGGGATTTAAATCCCGGTCGCGGTTGATTCGCTCCCTGGGACCA                               | ((((((((.....))))))(((.....)))).....                 |
| low                | Phe-GAA         | antisense       | -30.8          | 5    | TGGTGCCAGGACGGAATCGAACCCGCGACACGGGATTTCAATCCCTGCTCTACCACTGAGCTACCTGGGC                             | .....(((((((.....)))))).....                         |

|      |         |           |       |       |                                                                               |                                                       |
|------|---------|-----------|-------|-------|-------------------------------------------------------------------------------|-------------------------------------------------------|
| low  | Gly-CCC | sense     | -28.3 | 9.18  | GCGGGCGTGTATAATGCATTACCTGAGCTTCCAAGCTGACGAGGGTTCGATCCCTCGCCCCCTCCA            | (((((.....))).....(((.....)))).....(((.....)))).....  |
| low  | Gly-CCC | antisense | -26.6 | 10    | TGGAGCGGGGAAGGGAATCGAACCTCGTCATGAGCTGGGAAGCTAGGTAATGCCATTACGACGCCCGC          | .....(((.....))).....(((.....))).....(((.....)))..... |
| low  | Arg-CCT | sense     | -31.8 | 10.06 | GTCCCGTAGCTCAATTGGATAGAGCATCCCCCTCTAAAGGGAAGGTTGGAGTTGACCCCTCTCCGGGACGCCA     | (((((.....))).....(((.....))).....(((.....))).....)   |
| low  | Arg-CCT | antisense | -32.4 | 13.2  | TGGCGTCCCGAGAGGGGTCGAACCTCCAACCTCCCTTAGGAGGGGGTGTCTATCCAATTGAGCTACCGGGAC      | .....(((.....))).....(((.....))).....(((.....)))..... |
| low  | Cys-GCA | sense     | -23.2 | 17.4  | GGCTGAGTAGCAGAGTGGTTATGCACCGGATGCAAACTCGTGAACCGCGGTTGATCCGACCTCAGCCTCCA       | (((((.....))).....(((.....))).....(((.....))).....)   |
| low  | Cys-GCA | antisense | -24.3 | 10.1  | TGGAGGCTGAGGTCGGAATCGAACCGGCTTACGCGATTGCAATCCGGTCGATAACCACTCTGCTACTAGCC       | .....(((.....))).....(((.....))).....(((.....)))..... |
| low  | Arg-CCG | sense     | -33.9 | 9.03  | GCACCACTGAGCTCAGCTGGATAGAGTACCGCCCTCCGAAGCGGGGGTGTGGTTGCAATCCCGCTGTGCGCCA     | (((((.....))).....(((.....))).....(((.....))).....)   |
| low  | Arg-CCG | antisense | -28.7 | 14    | TGGCGCACCAGGGGATTTCGAACCCACGACCCCGCTTCCGAGGGCGGTAAGTCTATCCAGCTGAGCTACTGTGC    | .....(((.....))).....(((.....))).....(((.....)))..... |
| low  | His-GTG | sense     | -26.8 | 2.8   | GTGGCGTAGCTCAGTTGGTAGAGCACAGGATTGTGCTCTGGTGTCTGGTGTGATCCCATCTCCACCCCA         | (((((.....))).....(((.....))).....(((.....))).....)   |
| low  | His-GTG | antisense | -25.3 | 13.2  | TGGGGTGGACGATGGAATCGAACCCACGACCCAGGAGCCACAATCTGTGCTACCAACTGAGCTACGCCAC        | .....(((.....))).....(((.....))).....(((.....)))..... |
| low  | Met-CAT | sense     | -27.8 | 2.9   | CGCGGATGGAGCAGTCTGGTAGCTCTGTCGGGCTCATACCCGAAGGCTGTTGGTTCAAATCCAGCTCCCGCA      | (((((.....))).....(((.....))).....(((.....))).....)   |
| low  | Met-CAT | antisense | -25.4 | 6.5   | TGTTGCGGGAGCTGGATTGAACCAACGACCTTCGGGTTATGAGCCGACGAGCTACCACTGCTCATCCCGC        | .....(((.....))).....(((.....))).....(((.....)))..... |
| low  | Val-TAC | sense     | -29.3 | 5.7   | GGGTGATTAGCTCAGCTGGGAGAGCATCTGCCTTAAAGCAGAGGGTGGCGGTTGATCCCGTATCACCACCA       | (((((.....))).....(((.....))).....(((.....))).....)   |
| low  | Val-TAC | antisense | -29   | 1.5   | TGGTGGTGATGACGGGATCGAACCCGCGACCTCTGCTTGAAGCGAGTCTCCAGCTGAGCTAATCACCC          | .....(((.....))).....(((.....))).....(((.....)))..... |
| low  | Pro-GGG | sense     | -30.8 | 5.3   | CGGGCGTAGCGCAGCTGGTAGCGCACTTGCATGGGTGCAAGGGGTGAGTGTGCAATCTCCGCTCCGACCA        | (((((.....))).....(((.....))).....(((.....))).....)   |
| low  | Pro-GGG | antisense | -24.5 | 18.5  | TGGTCGGACGGAGTGATTGAACCACTGACCCCTGCACCCATGCAAGTGCCTACCAAGCTGGCGTACGCCCG       | .....(((.....))).....(((.....))).....(((.....)))..... |
| low  | Trp-CCA | sense     | -31.2 | 13    | AGGCCAGTAGCTCAATTGGCAGAGCGGGTCTCCAAACCGCAGGTTGGGGTTCGATTCCCTCCTGCCTGCCA       | (((((.....))).....(((.....))).....(((.....))).....)   |
| low  | Trp-CCA | antisense | -29.6 | 6.4   | TGGCAGCCAGGAGGAATCGAACCCCAACTCGGTTTTGAGAGCCCGCTGTGCAATGAGCTACTGGCCT           | .....(((.....))).....(((.....))).....(((.....)))..... |
| low  | Arg-TCT | sense     | -37.2 | 10.2  | GCGCCGTAGCTCAGCTGGATAGAGCATCCGCTTCTAAGCGATGGTGCAGGTTGATCCCTCGCGGTGCGCCA       | (((((.....))).....(((.....))).....(((.....))).....)   |
| low  | Arg-TCT | antisense | -31.1 | 9.5   | TGGCGACCCGCGCAGACTCGAACCTGCGACCATCCGCTTAGAAGCGGATGCTCTATCCAGCTGAGCTACGGCGC    | .....(((.....))).....(((.....))).....(((.....)))..... |
| low  | Arg-ACG | sense     | -27.7 | 12.7  | GCACTCATAGCTCAGCTGGATAGAGTACTCGGCTACGACCCGAGCGGTGGAGGTTGCAATCCCTCCTGAGTGGCCA  | (((((.....))).....(((.....))).....(((.....))).....)   |
| low  | Arg-ACG | antisense | -28.3 | 6.6   | TGGCGCACTCAGGAGGATCGAACCTCCGACCGCTCGTTCGTAGCGGAGTACTCTATCCAGCTGAGCTATGAGTGC   | .....(((.....))).....(((.....))).....(((.....)))..... |
| low  | Ala-GGC | sense     | -29.1 | 6.3   | GGGGCTATAGCTCAGCTGGGAGAGCGCTTGCATGGCATGCAAGAGGTGACGGTTCGATCCCGTCTAGCTCCACCA   | (((((.....))).....(((.....))).....(((.....))).....)   |
| low  | Ala-GGC | antisense | -25.4 | 13.6  | TGGTGGAGCTAGCGGGATCGAACCTCGACCTTGCATGCCATGCAAGCGCTCTCCAGCTGAGCTATAGCCCC       | (((((.....))).....(((.....))).....(((.....))).....)   |
| low  | Glu-TTC | sense     | -33.7 | 4.2   | GTCCCTTCGTCTAGTGGCTAGGACACCCCTTACCGCGGTAAAGGGTTCGAGTCCCTCAGGGAGCGCCA          | (((((.....))).....(((.....))).....(((.....))).....)   |
| low  | Glu-TTC | antisense | -35.1 | 4.7   | TGGCGTCCCTAGGGGACTCGAACCCCTGTACCAGCTGAAAGGGCGGTGCTCTAGCCACTAGCAAGGGGAC        | .....(((.....))).....(((.....))).....(((.....)))..... |
| low  | Gly-GCC | sense     | -31   | 5.8   | GCGGAAATAGCTCAGTTGGTAGAGCACGACCTTGCAAGGTGCGGGTTCGAGTCTCGTTCCTCCGCTCCA         | (((((.....))).....(((.....))).....(((.....))).....)   |
| low  | Gly-GCC | antisense | -27.7 | 9.3   | TGGAGCGGAAACAGACTCGAAGCTCGGACCCGACCTTGCAAGGTGCTGTCTACCAACTGAGCTATCCCGC        | .....(((.....))).....(((.....))).....(((.....)))..... |
| none | Val-GAC | sense     | -28.6 | 4.1   | AGGCAGTAGCTCAGTTGGTAGAGCACCACTTGACATGGTGGGGTGTGTTGTTGAAATCCAATCGTCCCTACCA     | (((((.....))).....(((.....))).....(((.....))).....)   |
| none | Val-GAC | antisense | -24.4 | 7.6   | TGGTAGGCAGATTGATTGAAACCAACGACCCCACTGTCAAGGTGGTGTCTAACCAACTGAGCTACGTGCCT       | .....(((.....))).....(((.....))).....(((.....)))..... |
| none | Pro-CGG | sense     | -31.7 | 6.8   | CGGAGCTAGCGAGCTTGGTAGCGCTCTGTTCCGGAGCAGAAAGGTGCTGGTTCGAAATCCAGCTCCGACCA       | (((((.....))).....(((.....))).....(((.....))).....)   |
| none | Pro-CGG | antisense | -27.7 | 7     | TGGTCGGAGCAGCTGGATTGAACCAAGCAGCTTCTGCTCCGAAACGAGCGCTACCAAGCTGCGCTACGCTCCG     | .....(((.....))).....(((.....))).....(((.....)))..... |
| none | Leu-TAG | sense     | -34.1 | 10.3  | GCGGACGTGGTGAATTGGTAGACACTGGATTAGTTTCCAGCGCCGCAAGCGTGAGAGTTGAGTCTCTCGTCCGACCA | (((((.....))).....(((.....))).....(((.....))).....)   |



| <b>Supplementary Table S3.</b> Antisense hot spots of the 3% highest expression in NN2 and SG17M in the mid-exponential (4h) and early stationary (8h) growth phase. |         |         |         |        |                                      |        |      |                                                                                  |
|----------------------------------------------------------------------------------------------------------------------------------------------------------------------|---------|---------|---------|--------|--------------------------------------|--------|------|----------------------------------------------------------------------------------|
| Isolate                                                                                                                                                              | Feature | Start   | End     | Strand | Gene                                 | Length | Time | Biological function (as classified by UniProt)                                   |
| NN2                                                                                                                                                                  | CDS     | 746130  | 746930  | -      | ephD_1                               | 800    | 4h   | Aerobic respiration                                                              |
| NN2                                                                                                                                                                  | CDS     | 1637122 | 1638753 | -      | algG_1                               | 1631   | 8h   | Alginate biosynthesis                                                            |
| SG17M                                                                                                                                                                | CDS     | 5547581 | 5548408 | +      | algB_4                               | 827    | 8h   | Alginate biosynthesis, Transcription regulation, Two-component regulatory system |
| SG17M                                                                                                                                                                | CDS     | 6829938 | 6832544 | +      | algC_2                               | 2606   | 4h   | Alginate biosynthesis, Lipopolysaccharide biosynthesis, Virulence                |
| NN2                                                                                                                                                                  | CDS     | 3556159 | 3557535 | -      | puuA_3                               | 1376   | 4h   | Amine and polyamine degradation                                                  |
| NN2                                                                                                                                                                  | CDS     | 6648290 | 6648910 | -      | rhtC_4                               | 620    | 4h   | Amino-acid metabolism, Aromatic amino acid metabolism                            |
| NN2                                                                                                                                                                  | CDS     | 6732729 | 6733982 | +      | glyA_3                               | 1253   | 8h   | Amino-acid metabolism, Aromatic amino acid metabolism                            |
| NN2                                                                                                                                                                  | CDS     | 1195132 | 1195377 | -      | amino acid transporter               | 245    | 4h   | Amino-acid metabolism, Aromatic amino acid metabolism                            |
| SG17M                                                                                                                                                                | CDS     | 622633  | 623325  | -      | yecS_5                               | 692    | 4h   | Amino-acid metabolism, Aromatic amino acid metabolism                            |
| NN2                                                                                                                                                                  | CDS     | 6430205 | 6430978 | +      | occP_1                               | 773    | 4h   | Amino-acid metabolism, Aromatic amino acid metabolism                            |
| SG17M                                                                                                                                                                | CDS     | 622633  | 623325  | -      | yecS_5                               | 692    | 8h   | Amino-acid metabolism, Aromatic amino acid metabolism                            |
| NN2                                                                                                                                                                  | CDS     | 397944  | 398636  | -      | yecS_1                               | 692    | 8h   | Amino-acid metabolism, Aromatic amino acid metabolism                            |
| NN2                                                                                                                                                                  | CDS     | 6499200 | 6500354 | -      | argE_1                               | 1154   | 4h   | Amino-acid metabolism, Aromatic amino acid metabolism                            |
| SG17M                                                                                                                                                                | CDS     | 604438  | 605190  | +      | puuD_2                               | 752    | 8h   | Amino-acid metabolism, Aromatic amino acid metabolism                            |
| SG17M                                                                                                                                                                | CDS     | 5436120 | 5437016 | +      | nad-dependent L-serine dehydrogenase | 896    | 4h   | Amino-acid metabolism, Aromatic amino acid metabolism                            |
| SG17M                                                                                                                                                                | CDS     | 963088  | 963693  | +      | trpG_2                               | 605    | 4h   | Amino-acid metabolism, Aromatic amino acid metabolism                            |
| SG17M                                                                                                                                                                | CDS     | 1941949 | 1943718 | -      | asnB_2                               | 1769   | 4h   | Amino-acid metabolism, Aromatic amino acid metabolism                            |
| NN2                                                                                                                                                                  | CDS     | 2285761 | 2286855 | -      | aroF_1                               | 1094   | 4h   | Amino-acid metabolism, Aromatic amino acid metabolism                            |
| NN2                                                                                                                                                                  | CDS     | 906152  | 907126  | -      | acoA_1                               | 974    | 4h   | Amino-acid metabolism, Aromatic amino acid metabolism                            |
| SG17M                                                                                                                                                                | CDS     | 942720  | 944198  | +      | trpE_2                               | 1478   | 8h   | Amino-acid metabolism, Aromatic amino acid metabolism                            |
| SG17M                                                                                                                                                                | CDS     | 6132174 | 6133346 | -      | aspC_4                               | 1172   | 8h   | Amino-acid metabolism, Aromatic amino acid metabolism                            |
| NN2                                                                                                                                                                  | CDS     | 1716775 | 1718544 | -      | asnB_1                               | 1769   | 8h   | Amino-acid metabolism, Aromatic amino acid metabolism                            |
| NN2                                                                                                                                                                  | CDS     | 5905113 | 5906837 | -      | ilvI_1                               | 1724   | 4h   | Amino-acid metabolism, Branched-chain amino acid metabolism                      |
| SG17M                                                                                                                                                                | CDS     | 6572803 | 6574482 | -      | hutU_2                               | 1679   | 4h   | Amino-acid metabolism, Branched-chain amino acid metabolism                      |
| SG17M                                                                                                                                                                | CDS     | 3985423 | 3987081 | +      | ilvG_2                               | 1658   | 8h   | Amino-acid metabolism, Branched-chain amino acid metabolism                      |



|       |     |         |         |   |         |       |    |                                                             |
|-------|-----|---------|---------|---|---------|-------|----|-------------------------------------------------------------|
| NN2   | CDS | 3560589 | 3562247 | + | ilvG_1  | 1658  | 8h | Amino-acid metabolism, Branched-chain amino acid metabolism |
| NN2   | CDS | 6028398 | 6030839 | - | fdoG_1  | 2441  | 8h | Anaerobic respiration                                       |
| SG17M | CDS | 474959  | 475741  | - | cloR_3  | 782   | 4h | Antibiotic biosynthesis                                     |
| NN2   | CDS | 250270  | 251052  | - | cloR_1  | 782   | 4h | Antibiotic biosynthesis                                     |
| NN2   | CDS | 5605530 | 5606288 | + | tcmP    | 758   | 4h | Antibiotic resistance                                       |
| NN2   | CDS | 5629072 | 5629845 | + | tcmP    | 773   | 4h | Antibiotic resistance                                       |
| NN2   | CDS | 4417307 | 4418755 | + | ttgl_5  | 1448  | 4h | Antibiotic resistance                                       |
| SG17M | CDS | 6635402 | 6636880 | + | ttgl_12 | 1478  | 4h | Antibiotic resistance                                       |
| SG17M | CDS | 4885094 | 4886542 | + | ttgl_11 | 1448  | 4h | Antibiotic resistance                                       |
| NN2   | CDS | 177587  | 180634  | + | swrC_1  | 3047  | 4h | Antibiotic resistance                                       |
| SG17M | CDS | 1520849 | 1521478 | - | sttH_5  | 629   | 4h | Antibiotic resistance                                       |
| NN2   | CDS | 1296146 | 1296775 | - | sttH_2  | 629   | 4h | Antibiotic resistance                                       |
| NN2   | CDS | 5684660 | 5692924 | - | ndvB_1  | 8264  | 4h | Antibiotic resistance                                       |
| SG17M | CDS | 6510630 | 6513101 | + | mrcA_2  | 2471  | 4h | Antibiotic resistance                                       |
| SG17M | CDS | 741770  | 742213  | - | mexR_2  | 443   | 4h | Antibiotic resistance                                       |
| SG17M | CDS | 3521429 | 3536404 | + | lgrD_7  | 14975 | 4h | Antibiotic resistance                                       |
| SG17M | CDS | 94239   | 95732   | + | cat1_2  | 1493  | 4h | Antibiotic resistance                                       |
| SG17M | CDS | 1827500 | 1828678 | + | bcr_4   | 1178  | 4h | Antibiotic resistance                                       |
| SG17M | CDS | 6183330 | 6183860 | + | bamE_2  | 530   | 4h | Antibiotic resistance                                       |
| NN2   | CDS | 5983280 | 5983810 | + | bamE_1  | 530   | 4h | Antibiotic resistance                                       |
| SG17M | CDS | 96369   | 97514   | - | wbpZ    | 1145  | 8h | Antibiotic resistance                                       |
| NN2   | CDS | 5605530 | 5606288 | + | tcmP    | 758   | 8h | Antibiotic resistance                                       |
| NN2   | CDS | 5629072 | 5629845 | + | tcmP    | 773   | 8h | Antibiotic resistance                                       |
| SG17M | CDS | 1063308 | 1064771 | - | ttgl_7  | 1463  | 8h | Antibiotic resistance                                       |
| NN2   | CDS | 4417307 | 4418755 | + | ttgl_5  | 1448  | 8h | Antibiotic resistance                                       |
| SG17M | CDS | 4885094 | 4886542 | + | ttgl_11 | 1448  | 8h | Antibiotic resistance                                       |
| SG17M | CDS | 1520849 | 1521478 | - | sttH_5  | 629   | 8h | Antibiotic resistance                                       |

|       |     |         |         |   |                    |       |    |                                                                         |
|-------|-----|---------|---------|---|--------------------|-------|----|-------------------------------------------------------------------------|
| NN2   | CDS | 1296146 | 1296775 | - | sttH_2             | 629   | 8h | Antibiotic resistance                                                   |
| SG17M | CDS | 5898272 | 5906536 | - | ndvB_2             | 8264  | 8h | Antibiotic resistance                                                   |
| NN2   | CDS | 5684660 | 5692924 | - | ndvB_1             | 8264  | 8h | Antibiotic resistance                                                   |
| SG17M | CDS | 6510630 | 6513101 | + | mrcA_2             | 2471  | 8h | Antibiotic resistance                                                   |
| SG17M | CDS | 741770  | 742213  | - | mexR_2             | 443   | 8h | Antibiotic resistance                                                   |
| SG17M | CDS | 3521429 | 3536404 | + | lgrD_7             | 14975 | 8h | Antibiotic resistance                                                   |
| SG17M | CDS | 2290957 | 2292516 | - | emrB_4             | 1559  | 8h | Antibiotic resistance                                                   |
| SG17M | CDS | 5354914 | 5356161 | + | cefD_4             | 1247  | 8h | Antibiotic resistance                                                   |
| NN2   | CDS | 4942667 | 4943914 | + | cefD_2             | 1247  | 8h | Antibiotic resistance                                                   |
| SG17M | CDS | 640424  | 641149  | + | cat_4              | 725   | 8h | Antibiotic resistance                                                   |
| SG17M | CDS | 1827500 | 1828678 | + | bcr_4              | 1178  | 8h | Antibiotic resistance                                                   |
| NN2   | CDS | 1602558 | 1603736 | + | bcr_2              | 1178  | 8h | Antibiotic resistance                                                   |
| SG17M | CDS | 6183330 | 6183860 | + | bamE_2             | 530   | 8h | Antibiotic resistance                                                   |
| NN2   | CDS | 5983280 | 5983810 | + | bamE_1             | 530   | 8h | Antibiotic resistance                                                   |
| SG17M | CDS | 4229390 | 4230892 | + | nhaB_2             | 1502  | 8h | Antiport, Ion transport, Sodium transport, Transport                    |
| NN2   | CDS | 3804070 | 3805572 | + | nhaB_1             | 1502  | 8h | Antiport, Ion transport, Sodium transport, Transport                    |
| NN2   | CDS | 4858511 | 4860523 | + | neutral ceramidase | 2012  | 8h | Apoptosis, Lipid metabolism, Sphingolipid metabolism                    |
| NN2   | CDS | 5483524 | 5485017 | + | rpoN_1             | 1493  | 8h | Arginine metabolism, Transcription, Transcription regulation            |
| NN2   | CDS | 6852140 | 6852898 | - | tsaC1_1            | 758   | 8h | Aromatic hydrocarbons catabolism                                        |
| NN2   | CDS | 935369  | 936673  | - | nicT_1             | 1304  | 8h | Aromatic hydrocarbons catabolism                                        |
| NN2   | CDS | 933729  | 934535  | - | hpcH_1             | 806   | 8h | Aromatic hydrocarbons catabolism                                        |
| NN2   | CDS | 934548  | 935351  | - | hpcG_1             | 803   | 8h | Aromatic hydrocarbons catabolism                                        |
| NN2   | CDS | 6133799 | 6134752 | + | pcpD_2             | 953   | 4h | Aromatic hydrocarbons catabolism, Electron transport, Transport         |
| SG17M | CDS | 596990  | 598372  | + | nicP_13            | 1382  | 4h | Aromatic hydrocarbons catabolism, Transport                             |
| NN2   | CDS | 372301  | 373683  | + | nicP_2             | 1382  | 8h | Aromatic hydrocarbons catabolism, Transport                             |
| NN2   | CDS | 4198755 | 4199588 | - | ylxH_1             | 833   | 8h | Bacterial flagellum biogenesis                                          |
| SG17M | CDS | 6007007 | 6007582 | - | pucB_2             | 575   | 4h | Bacteriochlorophyll, Chlorophyll, Chromophore, Magnesium, Metal-binding |

|       |     |         |         |   |                                           |      |    |                                                                |
|-------|-----|---------|---------|---|-------------------------------------------|------|----|----------------------------------------------------------------|
| SG17M | CDS | 4164735 | 4172879 | - | bapA                                      | 8144 | 4h | Biofilm formation                                              |
| NN2   | CDS | 3739673 | 3747559 | - | bapA                                      | 7886 | 4h | Biofilm formation                                              |
| SG17M | CDS | 178446  | 179126  | + | mcbR_2                                    | 680  | 4h | Biofilm formation                                              |
| NN2   | CDS | 6856719 | 6857399 | + | mcbR_1                                    | 680  | 4h | Biofilm formation                                              |
| SG17M | CDS | 4164735 | 4172879 | - | bapA                                      | 8144 | 8h | Biofilm formation                                              |
| NN2   | CDS | 3739673 | 3747559 | - | bapA                                      | 7886 | 8h | Biofilm formation                                              |
| SG17M | CDS | 178446  | 179126  | + | mcbR_2                                    | 680  | 8h | Biofilm formation                                              |
| NN2   | CDS | 4348918 | 4349889 | + | czcD_2                                    | 971  | 8h | Cadmium resistance, Ion transport, Transport, Zinc transport   |
| SG17M | CDS | 4509459 | 4510688 | - | czcB_4                                    | 1229 | 4h | Cadmium resistance, Transport                                  |
| NN2   | CDS | 4907798 | 4909027 | + | czcB_2                                    | 1229 | 4h | Cadmium resistance, Transport                                  |
| NN2   | CDS | 4909038 | 4912178 | + | czcA_2                                    | 3140 | 4h | Cadmium resistance, Transport                                  |
| NN2   | CDS | 4907798 | 4909027 | + | czcB_2                                    | 1229 | 8h | Cadmium resistance, Transport                                  |
| SG17M | CDS | 6775127 | 6777979 | + | cyaA_2                                    | 2852 | 4h | cAMP biosynthesis                                              |
| NN2   | CDS | 6575079 | 6577931 | + | cyaA_1                                    | 2852 | 8h | cAMP biosynthesis                                              |
| NN2   | CDS | 3277270 | 3278220 | - | kdgK_1                                    | 950  | 8h | Carbohydrate metabolism                                        |
| SG17M | CDS | 4139632 | 4140345 | - | anoR_2                                    | 713  | 8h | Carbohydrate metabolism                                        |
| SG17M | CDS | 977246  | 978337  | - | anmK_2                                    | 1091 | 8h | Carbohydrate metabolism                                        |
| NN2   | CDS | 5876585 | 5877232 | - | can_1                                     | 647  | 4h | Carbon utilisation                                             |
| NN2   | CDS | 1542106 | 1543218 | + | frmA_1                                    | 1112 | 4h | Cell adhesion                                                  |
| NN2   | CDS | 1296896 | 1297849 | + | cdhR_3                                    | 953  | 4h | Cell adhesion                                                  |
| SG17M | CDS | 1521599 | 1522552 | + | cdhR_12                                   | 953  | 4h | Cell adhesion                                                  |
| SG17M | CDS | 4073721 | 4074986 | + | fap                                       | 1265 | 8h | Cell adhesion                                                  |
| NN2   | CDS | 1542106 | 1543218 | + | frmA_1                                    | 1112 | 8h | Cell adhesion                                                  |
| SG17M | CDS | 1744357 | 1746744 | + | bamA_2                                    | 2387 | 8h | Cell adhesion                                                  |
| SG17M | CDS | 44533   | 44823   | + | zapA                                      | 290  | 4h | Cell cycle, Cell division, DNA damage, Septation, SOS response |
| SG17M | CDS | 5617446 | 5618504 | + | sacchrp dh NADP domain-containing protein | 1058 | 4h | Cell cycle, Cell division, DNA damage, Septation, SOS response |
| SG17M | CDS | 5884842 | 5887784 | + | ftsK domain-containing protein            | 2942 | 4h | Cell cycle, Cell division, DNA damage, Septation, SOS response |

|       |     |         |         |   |                                 |      |    |                                                                       |
|-------|-----|---------|---------|---|---------------------------------|------|----|-----------------------------------------------------------------------|
| SG17M | CDS | 5806529 | 5807587 | - | zapE_6                          | 1058 | 4h | Cell cycle, Cell division, DNA damage, Septation, SOS response        |
| NN2   | CDS | 5610020 | 5610979 | + | xerD_3                          | 959  | 4h | Cell cycle, Cell division, DNA damage, Septation, SOS response        |
| SG17M | CDS | 2442508 | 2442993 | - | sulA_3                          | 485  | 4h | Cell cycle, Cell division, DNA damage, Septation, SOS response        |
| NN2   | CDS | 2217328 | 2217813 | - | sulA_1                          | 485  | 4h | Cell cycle, Cell division, DNA damage, Septation, SOS response        |
| NN2   | CDS | 6309332 | 6310396 | - | ftsZ                            | 1184 | 4h | Cell cycle, Cell division, DNA damage, Septation, SOS response        |
| SG17M | CDS | 44533   | 44823   | + | zapA                            | 290  | 8h | Cell cycle, Cell division, DNA damage, Septation, SOS response        |
| NN2   | CDS | 4935885 | 4936586 | + | trbL                            | 701  | 8h | Cell cycle, Cell division, DNA damage, Septation, SOS response        |
| SG17M | CDS | 5548434 | 5550104 | - | tadC domain-containing protein  | 1670 | 8h | Cell cycle, Cell division, DNA damage, Septation, SOS response        |
| SG17M | CDS | 6302949 | 6303356 | - | rho N domain-containing protein | 407  | 8h | Cell cycle, Cell division, DNA damage, Septation, SOS response        |
| SG17M | CDS | 5884842 | 5887784 | + | ftsK domain-containing protein  | 2942 | 8h | Cell cycle, Cell division, DNA damage, Septation, SOS response        |
| SG17M | CDS | 5352452 | 5353336 | + | yofA_10                         | 884  | 8h | Cell cycle, Cell division, DNA damage, Septation, SOS response        |
| NN2   | CDS | 5610020 | 5610979 | + | xerD_3                          | 959  | 8h | Cell cycle, Cell division, DNA damage, Septation, SOS response        |
| NN2   | CDS | 5406133 | 5407776 | - | groL_1                          | 1643 | 8h | Cell cycle, Cell division, DNA damage, Septation, SOS response        |
| SG17M | CDS | 6502098 | 6503753 | - | damX_2                          | 1655 | 8h | Cell cycle, Cell division, DNA damage, Septation, SOS response        |
| NN2   | CDS | 1828598 | 1829335 | - | flgA                            | 737  | 4h | Cell motility                                                         |
| SG17M | CDS | 2053774 | 2054511 | - | flgA                            | 737  | 8h | Cell motility                                                         |
| SG17M | CDS | 6869119 | 6870018 | - | mepM_8                          | 899  | 4h | Cell shape, Cell wall biogenesis/degradation, Peptidoglycan synthesis |
| SG17M | CDS | 978340  | 979779  | - | mepM_5                          | 1439 | 4h | Cell shape, Cell wall biogenesis/degradation, Peptidoglycan synthesis |
| NN2   | CDS | 6669069 | 6669968 | - | mepM_4                          | 899  | 4h | Cell shape, Cell wall biogenesis/degradation, Peptidoglycan synthesis |
| NN2   | CDS | 753639  | 755078  | - | mepM_1                          | 1439 | 4h | Cell shape, Cell wall biogenesis/degradation, Peptidoglycan synthesis |
| NN2   | CDS | 3264528 | 3266225 | - | pbpC_1                          | 1697 | 8h | Cell shape, Cell wall biogenesis/degradation, Peptidoglycan synthesis |
| NN2   | CDS | 4553317 | 4553823 | + | oprF_3                          | 506  | 8h | Cell shape, Cell wall biogenesis/degradation, Peptidoglycan synthesis |
| SG17M | CDS | 978340  | 979779  | - | mepM_5                          | 1439 | 8h | Cell shape, Cell wall biogenesis/degradation, Peptidoglycan synthesis |
| NN2   | CDS | 753639  | 755078  | - | mepM_1                          | 1439 | 8h | Cell shape, Cell wall biogenesis/degradation, Peptidoglycan synthesis |
| NN2   | CDS | 645571  | 646314  | - | cpdA_1                          | 743  | 8h | Cell shape, Cell wall biogenesis/degradation, Peptidoglycan synthesis |

|       |     |         |         |   |         |      |    |                                                                       |
|-------|-----|---------|---------|---|---------|------|----|-----------------------------------------------------------------------|
| SG17M | CDS | 6362761 | 6363837 | - | alr_2   | 1076 | 8h | Cell shape, Cell wall biogenesis/degradation, Peptidoglycan synthesis |
| SG17M | CDS | 451172  | 452629  | - | aam_4   | 1457 | 4h | Cellular amide catabolic process                                      |
| SG17M | CDS | 451172  | 452629  | - | aam_4   | 1457 | 8h | Cellular amide catabolic process                                      |
| SG17M | CDS | 5760354 | 5761952 | + | dppA_7  | 1598 | 4h | Chemotaxis, two-component regulatory system, signal transduction      |
| NN2   | CDS | 2978178 | 2979500 | - | qseC_2  | 1322 | 4h | Chemotaxis, two-component regulatory system, signal transduction      |
| NN2   | CDS | 4398491 | 4400116 | + | mcpQ_6  | 1625 | 4h | Chemotaxis, two-component regulatory system, signal transduction      |
| SG17M | CDS | 724590  | 732008  | + | cheA_6  | 7418 | 4h | Chemotaxis, two-component regulatory system, signal transduction      |
| NN2   | CDS | 499890  | 507308  | + | cheA_2  | 7418 | 4h | Chemotaxis, two-component regulatory system, signal transduction      |
| SG17M | CDS | 5179466 | 5180140 | - | queC_2  | 674  | 8h | Chemotaxis, two-component regulatory system, signal transduction      |
| NN2   | CDS | 4398491 | 4400116 | + | mcpQ_6  | 1625 | 8h | Chemotaxis, two-component regulatory system, signal transduction      |
| SG17M | CDS | 4866278 | 4867903 | + | mcpQ_14 | 1625 | 8h | Chemotaxis, two-component regulatory system, signal transduction      |
| SG17M | CDS | 6344464 | 6346089 | + | mcpH_4  | 1625 | 8h | Chemotaxis, two-component regulatory system, signal transduction      |
| NN2   | CDS | 2879599 | 2881215 | - | ctpH_1  | 1616 | 8h | Chemotaxis, two-component regulatory system, signal transduction      |
| NN2   | CDS | 5301933 | 5303138 | + | srpC_1  | 1205 | 4h | Chromate resistance, Stress response, Transport                       |
| NN2   | CDS | 5577747 | 5578607 | + | soj_7   | 860  | 8h | Chromosome partition                                                  |
| SG17M | CDS | 6505446 | 6507590 | - | pilQ_2  | 2144 | 4h | Competence, Protein transport, Transport                              |
| NN2   | CDS | 5681619 | 5683154 | + | traG    | 1535 | 4h | Conjugation                                                           |
| SG17M | CDS | 5895231 | 5896766 | + | traG    | 1535 | 4h | Conjugation                                                           |
| NN2   | CDS | 5681619 | 5683154 | + | traG    | 1535 | 8h | Conjugation                                                           |
| SG17M | CDS | 5895231 | 5896766 | + | traG    | 1535 | 8h | Conjugation                                                           |
| SG17M | CDS | 5172807 | 5174318 | + | traG    | 1511 | 8h | Conjugation                                                           |
| NN2   | CDS | 5618409 | 5620934 | - | virD4   | 2525 | 8h | Conjugation                                                           |
| SG17M | CDS | 4711629 | 4712357 | + | gloC_3  | 728  | 4h | Detoxification                                                        |
| NN2   | CDS | 4243844 | 4244572 | + | gloC_1  | 728  | 4h | Detoxification                                                        |
| SG17M | CDS | 4711629 | 4712357 | + | gloC_3  | 728  | 8h | Detoxification                                                        |
| SG17M | CDS | 227864  | 228973  | + | recF_2  | 1109 | 4h | DNA damage, DNA repair, DNA replication                               |
| SG17M | CDS | 5512196 | 5515270 | + | dnaE2_2 | 3074 | 4h | DNA damage, DNA repair, DNA replication                               |

|       |     |         |         |   |                                           |      |    |                                         |
|-------|-----|---------|---------|---|-------------------------------------------|------|----|-----------------------------------------|
| NN2   | CDS | 5275685 | 5278759 | + | dnaE2_1                                   | 3074 | 4h | DNA damage, DNA repair, DNA replication |
| NN2   | CDS | 4773302 | 4774351 | - | dinB_1                                    | 1049 | 4h | DNA damage, DNA repair, DNA replication |
| SG17M | CDS | 5998185 | 5999546 | - | radA_2                                    | 1361 | 8h | DNA damage, DNA repair, DNA replication |
| SG17M | CDS | 5512196 | 5515270 | + | dnaE2_2                                   | 3074 | 8h | DNA damage, DNA repair, DNA replication |
| SG17M | CDS | 1280612 | 1281205 | + | lon                                       | 593  | 4h | DNA damage, DNA repair, Stress response |
| NN2   | CDS | 1055909 | 1056502 | + | lon                                       | 593  | 4h | DNA damage, DNA repair, Stress response |
| NN2   | CDS | 1427989 | 1433229 | + | dna repair ATPase                         | 5240 | 4h | DNA damage, DNA repair, Stress response |
| SG17M | CDS | 1652692 | 1657932 | + | dna repair ATPase                         | 5240 | 4h | DNA damage, DNA repair, Stress response |
| NN2   | CDS | 5819926 | 5820540 | - | abasic site-processing protein            | 614  | 4h | DNA damage, DNA repair, Stress response |
| SG17M | CDS | 144179  | 146920  | - | polA_2                                    | 2741 | 4h | DNA damage, DNA repair, Stress response |
| SG17M | CDS | 1774714 | 1777281 | - | mutS_2                                    | 2567 | 4h | DNA damage, DNA repair, Stress response |
| NN2   | CDS | 1550001 | 1552568 | - | mutS_1                                    | 2567 | 4h | DNA damage, DNA repair, Stress response |
| SG17M | CDS | 2148554 | 2152900 | + | csdB_2                                    | 4346 | 4h | DNA damage, DNA repair, Stress response |
| NN2   | CDS | 1923383 | 1927729 | + | csdB_1                                    | 4346 | 4h | DNA damage, DNA repair, Stress response |
| NN2   | CDS | 5662794 | 5664275 | + | addA_1                                    | 1481 | 4h | DNA damage, DNA repair, Stress response |
| SG17M | CDS | 1280612 | 1281205 | + | lon                                       | 593  | 8h | DNA damage, DNA repair, Stress response |
| NN2   | CDS | 1055909 | 1056502 | + | lon                                       | 593  | 8h | DNA damage, DNA repair, Stress response |
| NN2   | CDS | 1427989 | 1433229 | + | dna repair ATPase                         | 5240 | 8h | DNA damage, DNA repair, Stress response |
| SG17M | CDS | 6033776 | 6034390 | - | abasic site-processing protein            | 614  | 8h | DNA damage, DNA repair, Stress response |
| NN2   | CDS | 6822452 | 6825193 | - | polA_1                                    | 2741 | 8h | DNA damage, DNA repair, Stress response |
| NN2   | CDS | 2610102 | 2612624 | - | helD_1                                    | 2522 | 8h | DNA damage, DNA repair, Stress response |
| SG17M | CDS | 2148554 | 2152900 | + | csdB_2                                    | 4346 | 8h | DNA damage, DNA repair, Stress response |
| NN2   | CDS | 1923383 | 1927729 | + | csdB_1                                    | 4346 | 8h | DNA damage, DNA repair, Stress response |
| NN2   | CDS | 3947816 | 3948709 | + | alkA_1                                    | 893  | 8h | DNA damage, DNA repair, Stress response |
| NN2   | CDS | 5662794 | 5664275 | + | addA_1                                    | 1481 | 8h | DNA damage, DNA repair, Stress response |
| NN2   | CDS | 324199  | 327330  | + | tyr_recombinase_domain-containing_protein | 3131 | 4h | DNA integration/DNA recombination       |
| SG17M | CDS | 552623  | 553783  | + | intQ_2                                    | 1160 | 4h | DNA integration/DNA recombination       |

|       |     |         |         |   |                                           |      |    |                                                          |
|-------|-----|---------|---------|---|-------------------------------------------|------|----|----------------------------------------------------------|
| NN2   | CDS | 327934  | 329094  | + | intQ_1                                    | 1160 | 4h | DNA integration/DNA recombination                        |
| SG17M | CDS | 2863284 | 2864666 | - | intA_3                                    | 1382 | 4h | DNA integration/DNA recombination                        |
| NN2   | CDS | 324199  | 327330  | + | tyr_recombinase_domain-containing_protein | 3131 | 8h | DNA integration/DNA recombination                        |
| SG17M | CDS | 552623  | 553783  | + | intQ_2                                    | 1160 | 8h | DNA integration/DNA recombination                        |
| NN2   | CDS | 327934  | 329094  | + | intQ_1                                    | 1160 | 8h | DNA integration/DNA recombination                        |
| SG17M | CDS | 5522688 | 5526323 | + | sbcC_2                                    | 3635 | 4h | DNA recombination, Transposition                         |
| NN2   | CDS | 5611096 | 5611632 | - | tnpA                                      | 536  | 8h | DNA recombination, Transposition                         |
| NN2   | CDS | 995675  | 996343  | - | transcriptional_regulator                 | 668  | 4h | DNA replication, Transcription, Transcription regulation |
| NN2   | CDS | 308773  | 314988  | - | dead/deah box helicase                    | 6215 | 4h | DNA replication, Transcription, Transcription regulation |
| SG17M | CDS | 533462  | 539677  | - | dead/deah box helicase                    | 6215 | 4h | DNA replication, Transcription, Transcription regulation |
| NN2   | CDS | 457009  | 457656  | + | acrR                                      | 647  | 4h | DNA replication, Transcription, Transcription regulation |
| NN2   | CDS | 583962  | 584912  | - | yhaJ_1                                    | 950  | 4h | DNA replication, Transcription, Transcription regulation |
| NN2   | CDS | 6601401 | 6603410 | + | rep_1                                     | 2009 | 4h | DNA replication, Transcription, Transcription regulation |
| NN2   | CDS | 233172  | 234836  | + | madA_1                                    | 1664 | 4h | DNA replication, Transcription, Transcription regulation |
| NN2   | CDS | 2016425 | 2017282 | - | hexR_1                                    | 857  | 4h | DNA replication, Transcription, Transcription regulation |
| NN2   | CDS | 683333  | 685327  | - | dnaG_1                                    | 1994 | 4h | DNA replication, Transcription, Transcription regulation |
| SG17M | CDS | 6363906 | 6365300 | - | dnaB_4                                    | 1394 | 4h | DNA replication, Transcription, Transcription regulation |
| SG17M | CDS | 5819539 | 5820882 | + | dnaB_3                                    | 1343 | 4h | DNA replication, Transcription, Transcription regulation |
| NN2   | CDS | 5582867 | 5584210 | + | dnaB_1                                    | 1343 | 4h | DNA replication, Transcription, Transcription regulation |
| SG17M | CDS | 225178  | 226722  | + | dnaA_2                                    | 1544 | 4h | DNA replication, Transcription, Transcription regulation |
| NN2   | CDS | 483     | 2027    | + | dnaA_1                                    | 1544 | 4h | DNA replication, Transcription, Transcription regulation |
| NN2   | CDS | 631190  | 632068  | - | cynR_3                                    | 878  | 4h | DNA replication, Transcription, Transcription regulation |
| NN2   | CDS | 308773  | 314988  | - | dead/deah box helicase                    | 6215 | 8h | DNA replication, Transcription, Transcription regulation |
| SG17M | CDS | 533462  | 539677  | - | dead/deah box helicase                    | 6215 | 8h | DNA replication, Transcription, Transcription regulation |
| NN2   | CDS | 457009  | 457656  | + | acrR                                      | 647  | 8h | DNA replication, Transcription, Transcription regulation |
| SG17M | CDS | 1700389 | 1700859 | + | zntR_3                                    | 470  | 8h | DNA replication, Transcription, Transcription regulation |
| NN2   | CDS | 1475678 | 1476148 | + | zntR_1                                    | 470  | 8h | DNA replication, Transcription, Transcription regulation |



|       |     |         |         |   |                                                          |      |    |                                                          |
|-------|-----|---------|---------|---|----------------------------------------------------------|------|----|----------------------------------------------------------|
| NN2   | CDS | 1230671 | 1231675 | - | yejK_1                                                   | 1004 | 8h | DNA replication, Transcription, Transcription regulation |
| NN2   | CDS | 430522  | 431316  | + | thyA_1                                                   | 794  | 8h | DNA replication, Transcription, Transcription regulation |
| SG17M | CDS | 2152908 | 2156387 | - | pleC_2                                                   | 3479 | 8h | DNA replication, Transcription, Transcription regulation |
| NN2   | CDS | 1927737 | 1931216 | - | pleC_1                                                   | 3479 | 8h | DNA replication, Transcription, Transcription regulation |
| NN2   | CDS | 3129420 | 3129899 | + | fecl_6                                                   | 479  | 8h | DNA replication, Transcription, Transcription regulation |
| NN2   | CDS | 925694  | 926116  | + | farR_1                                                   | 422  | 8h | DNA replication, Transcription, Transcription regulation |
| NN2   | CDS | 5582867 | 5584210 | + | dnaB_1                                                   | 1343 | 8h | DNA replication, Transcription, Transcription regulation |
| NN2   | CDS | 483     | 2027    | + | dnaA_1                                                   | 1544 | 8h | DNA replication, Transcription, Transcription regulation |
| SG17M | CDS | 4923222 | 4924136 | + | dmlR_49                                                  | 914  | 8h | DNA replication, Transcription, Transcription regulation |
| SG17M | CDS | 365149  | 366057  | - | dmlR_28                                                  | 908  | 8h | DNA replication, Transcription, Transcription regulation |
| NN2   | CDS | 140460  | 141368  | - | dmlR_2                                                   | 908  | 8h | DNA replication, Transcription, Transcription regulation |
| SG17M | CDS | 1440701 | 1441333 | - | dauR_2                                                   | 632  | 8h | DNA replication, Transcription, Transcription regulation |
| NN2   | CDS | 1215998 | 1216630 | - | dauR_1                                                   | 632  | 8h | DNA replication, Transcription, Transcription regulation |
| SG17M | CDS | 855891  | 856769  | - | cynR_9                                                   | 878  | 8h | DNA replication, Transcription, Transcription regulation |
| SG17M | CDS | 5834749 | 5836668 | + | topA_4                                                   | 1919 | 8h | DNA topological change                                   |
| NN2   | CDS | 5598077 | 5599996 | + | topA_2                                                   | 1919 | 8h | DNA topological change                                   |
| SG17M | CDS | 4510685 | 4511932 | - | czcC_4                                                   | 1247 | 4h | Efflux transmembrane transporter activity                |
| NN2   | CDS | 4906554 | 4907801 | + | czcC_2                                                   | 1247 | 8h | Efflux transmembrane transporter activity                |
| NN2   | CDS | 2271900 | 2273555 | - | flavoprotein-ubiquinone_oxidoreductase                   | 1655 | 4h | Electron transport, Respiratory chain, Transport         |
| SG17M | CDS | 2227777 | 2227989 | + | fe-S protein                                             | 212  | 4h | Electron transport, Respiratory chain, Transport         |
| SG17M | CDS | 1728385 | 1728738 | + | fe-S oxidoreductase                                      | 353  | 4h | Electron transport, Respiratory chain, Transport         |
| SG17M | CDS | 6189589 | 6192405 | + | fad binding oxidoreductase                               | 2816 | 4h | Electron transport, Respiratory chain, Transport         |
| SG17M | CDS | 2497080 | 2498735 | - | electron transfer-flavoprotein-ubiquinone oxidoreductase | 1655 | 4h | Electron transport, Respiratory chain, Transport         |
| SG17M | CDS | 142791  | 143084  | - | cytochrome C domain-containing protein                   | 293  | 4h | Electron transport, Respiratory chain, Transport         |
| SG17M | CDS | 3228386 | 3229576 | + | thiA_4                                                   | 1190 | 4h | Electron transport, Respiratory chain, Transport         |
| SG17M | CDS | 57455   | 60472   | + | soxA_2                                                   | 3017 | 4h | Electron transport, Respiratory chain, Transport         |
| SG17M | CDS | 624955  | 626184  | - | serA_2                                                   | 1229 | 4h | Electron transport, Respiratory chain, Transport         |

|       |     |         |         |   |                                                          |      |    |                                                            |
|-------|-----|---------|---------|---|----------------------------------------------------------|------|----|------------------------------------------------------------|
| SG17M | CDS | 444730  | 445848  | + | pntAA_2                                                  | 1118 | 4h | Electron transport, Respiratory chain, Transport           |
| SG17M | CDS | 1053929 | 1055137 | - | phzS_2                                                   | 1208 | 4h | Electron transport, Respiratory chain, Transport           |
| SG17M | CDS | 1430559 | 1434344 | + | narG_2                                                   | 3785 | 4h | Electron transport, Respiratory chain, Transport           |
| NN2   | CDS | 2271900 | 2273555 | - | flavoprotein-ubiquinone_oxidoreductase                   | 1655 | 8h | Electron transport, Respiratory chain, Transport           |
| SG17M | CDS | 1728385 | 1728738 | + | fe-S oxidoreductase                                      | 353  | 8h | Electron transport, Respiratory chain, Transport           |
| SG17M | CDS | 1333905 | 1335044 | - | endo/exonuclease/phosphatase domain-containing protein   | 1139 | 8h | Electron transport, Respiratory chain, Transport           |
| SG17M | CDS | 2497080 | 2498735 | - | electron transfer-flavoprotein-ubiquinone oxidoreductase | 1655 | 8h | Electron transport, Respiratory chain, Transport           |
| NN2   | CDS | 2437956 | 2438597 | - | cytochrome C domain-containing protein                   | 641  | 8h | Electron transport, Respiratory chain, Transport           |
| SG17M | CDS | 3228386 | 3229576 | + | thlA_4                                                   | 1190 | 8h | Electron transport, Respiratory chain, Transport           |
| NN2   | CDS | 6735729 | 6738746 | + | soxA_1                                                   | 3017 | 8h | Electron transport, Respiratory chain, Transport           |
| SG17M | CDS | 624955  | 626184  | - | serA_2                                                   | 1229 | 8h | Electron transport, Respiratory chain, Transport           |
| SG17M | CDS | 1053929 | 1055137 | - | phzS_2                                                   | 1208 | 8h | Electron transport, Respiratory chain, Transport           |
| NN2   | CDS | 2748740 | 2749153 | - | ndhC_1                                                   | 413  | 8h | Electron transport, Respiratory chain, Transport           |
| NN2   | CDS | 4093487 | 4094443 | + | ccoP2_1                                                  | 956  | 8h | Electron transport, Respiratory chain, Transport           |
| SG17M | CDS | 3687342 | 3688403 | + | adhA_2                                                   | 1061 | 8h | Electron transport, Respiratory chain, Transport           |
| NN2   | CDS | 3262509 | 3263570 | + | adhA_1                                                   | 1061 | 8h | Electron transport, Respiratory chain, Transport           |
| SG17M | CDS | 1932052 | 1933767 | - | entS_4                                                   | 1715 | 4h | Enterobactin biosynthesis, enterobactin transport          |
| NN2   | CDS | 4503236 | 4503964 | + | entD_1                                                   | 728  | 4h | Enterobactin biosynthesis, enterobactin transport          |
| SG17M | CDS | 5798883 | 5800103 | + | epsF_8                                                   | 1220 | 4h | Exopolysaccharide synthesis                                |
| NN2   | CDS | 5562211 | 5563431 | + | epsF_4                                                   | 1220 | 4h | Exopolysaccharide synthesis                                |
| SG17M | CDS | 6704009 | 6705793 | + | epsE_8                                                   | 1784 | 4h | Exopolysaccharide synthesis                                |
| SG17M | CDS | 5798883 | 5800103 | + | epsF_8                                                   | 1220 | 8h | Exopolysaccharide synthesis                                |
| NN2   | CDS | 5562211 | 5563431 | + | epsF_4                                                   | 1220 | 8h | Exopolysaccharide synthesis                                |
| SG17M | CDS | 6704009 | 6705793 | + | epsE_8                                                   | 1784 | 8h | Exopolysaccharide synthesis                                |
| NN2   | CDS | 2337148 | 2338974 | - | long chain acyl-CoA synthetase                           | 1826 | 4h | Fatty acid metabolism, Lipid degradation, Lipid metabolism |
| NN2   | CDS | 5231046 | 5231951 | + | Fatty acid hydroxylase domain-containing protein         | 905  | 4h | Fatty acid metabolism, Lipid degradation, Lipid metabolism |

|       |     |         |         |   |                                |      |    |                                                            |
|-------|-----|---------|---------|---|--------------------------------|------|----|------------------------------------------------------------|
| NN2   | CDS | 2377059 | 2377664 | + | tesA_1                         | 605  | 4h | Fatty acid metabolism, Lipid degradation, Lipid metabolism |
| NN2   | CDS | 6716762 | 6718723 | + | fadF_1                         | 1961 | 4h | Fatty acid metabolism, Lipid degradation, Lipid metabolism |
| SG17M | CDS | 2434915 | 2437062 | + | fadB_5                         | 2147 | 4h | Fatty acid metabolism, Lipid degradation, Lipid metabolism |
| NN2   | CDS | 2209735 | 2211882 | + | fadB_1                         | 2147 | 4h | Fatty acid metabolism, Lipid degradation, Lipid metabolism |
| SG17M | CDS | 6205371 | 6206726 | + | fabG_30                        | 1355 | 4h | Fatty acid metabolism, Lipid degradation, Lipid metabolism |
| NN2   | CDS | 5409695 | 5410453 | + | fabG_12                        | 758  | 4h | Fatty acid metabolism, Lipid degradation, Lipid metabolism |
| SG17M | CDS | 2562327 | 2564153 | - | long chain acyl-CoA synthetase | 1826 | 8h | Fatty acid metabolism, Lipid degradation, Lipid metabolism |
| SG17M | CDS | 2434915 | 2437062 | + | fadB_5                         | 2147 | 8h | Fatty acid metabolism, Lipid degradation, Lipid metabolism |
| NN2   | CDS | 2209735 | 2211882 | + | fadB_1                         | 2147 | 8h | Fatty acid metabolism, Lipid degradation, Lipid metabolism |
| SG17M | CDS | 6205371 | 6206726 | + | fabG_30                        | 1355 | 8h | Fatty acid metabolism, Lipid degradation, Lipid metabolism |
| NN2   | CDS | 6005316 | 6006671 | + | fabG_13                        | 1355 | 8h | Fatty acid metabolism, Lipid degradation, Lipid metabolism |
| NN2   | CDS | 6476648 | 6477811 | - | adh1_1                         | 1163 | 4h | Fermentation                                               |
| NN2   | CDS | 6476648 | 6477811 | - | adh1_1                         | 1163 | 8h | Fermentation                                               |
| NN2   | CDS | 5631143 | 5632852 | + | bfpB_1                         | 1709 | 8h | Fimbrium biogenesis                                        |
| SG17M | CDS | 707034  | 708068  | + | pilT_4                         | 1034 | 4h | Fimbrium biogenesis, Transport                             |
| NN2   | CDS | 4582371 | 4583555 | - | fliC_1                         | 1184 | 4h | Flagellar synthesis                                        |
| SG17M | CDS | 2051961 | 2052710 | - | ycgR_2                         | 749  | 8h | Flagellum-dependent motility                               |
| NN2   | CDS | 5608004 | 5608843 | - | folP_1                         | 839  | 8h | Folate biosynthesis                                        |
| SG17M | CDS | 1281216 | 1282529 | - | yabl_2                         | 1313 | 4h | FtsZ-dependent cytokinesis                                 |
| NN2   | CDS | 1056513 | 1057826 | - | yabl_1                         | 1313 | 4h | FtsZ-dependent cytokinesis                                 |
| NN2   | CDS | 2225593 | 2227059 | + | gap2_1                         | 1466 | 8h | Glucose metabolic process                                  |
| SG17M | CDS | 718895  | 719848  | - | gshB_2                         | 953  | 4h | Glutathione biosynthesis                                   |
| NN2   | CDS | 494195  | 495148  | - | gshB_1                         | 953  | 4h | Glutathione biosynthesis                                   |
| NN2   | CDS | 6495265 | 6496848 | + | gshA_1                         | 1583 | 4h | Glutathione biosynthesis                                   |
| SG17M | CDS | 718895  | 719848  | - | gshB_2                         | 953  | 8h | Glutathione biosynthesis                                   |
| SG17M | CDS | 4655613 | 4656299 | + | gstB_6                         | 686  | 4h | Glutathione metabolic process                              |
| NN2   | CDS | 4187829 | 4188515 | + | gstB_3                         | 686  | 4h | Glutathione metabolic process                              |

|       |     |         |         |   |                                |      |    |                                                                |
|-------|-----|---------|---------|---|--------------------------------|------|----|----------------------------------------------------------------|
| SG17M | CDS | 4655613 | 4656299 | + | gstB_6                         | 686  | 8h | Glutathione metabolic process                                  |
| SG17M | CDS | 2462713 | 2463435 | - | ugpQ_2                         | 722  | 4h | Glycerol metabolism                                            |
| SG17M | CDS | 2462713 | 2463435 | - | ugpQ_2                         | 722  | 8h | Glycerol metabolism                                            |
| SG17M | CDS | 6731691 | 6733037 | + | glpT_4                         | 1346 | 4h | Glycerol metabolism, Transport                                 |
| NN2   | CDS | 6506914 | 6509790 | - | gcvP_2                         | 2876 | 4h | glycine decarboxylation                                        |
| SG17M | CDS | 6706963 | 6709839 | - | gcvP_4                         | 2876 | 8h | glycine decarboxylation                                        |
| NN2   | CDS | 6506914 | 6509790 | - | gcvP_2                         | 2876 | 8h | glycine decarboxylation                                        |
| NN2   | CDS | 3291032 | 3292318 | - | bkdB_1                         | 1286 | 8h | Glycolysis                                                     |
| NN2   | CDS | 6265838 | 6268486 | + | aceE_1                         | 2648 | 8h | Glycolysis                                                     |
| SG17M | CDS | 4621127 | 4621909 | + | hyi_2                          | 782  | 4h | Glyoxylate metabolic process                                   |
| SG17M | CDS | 6017313 | 6024023 | - | hxuA_8                         | 6710 | 4h | Heme/hemopexin-binding                                         |
| NN2   | CDS | 984588  | 987644  | + | hxuA_1                         | 3056 | 4h | Heme/hemopexin-binding                                         |
| SG17M | CDS | 1209286 | 1212342 | + | hxuA_5                         | 3056 | 8h | Heme/hemopexin-binding                                         |
| NN2   | CDS | 5803700 | 5810173 | - | hxuA_4                         | 6473 | 8h | Heme/hemopexin-binding                                         |
| NN2   | CDS | 984588  | 987644  | + | hxuA_1                         | 3056 | 8h | Heme/hemopexin-binding                                         |
| SG17M | CDS | 1257252 | 1258253 | - | fecR domain-containing protein | 1001 | 4h | Ion transport, Iron transport, Sensory transduction, Transport |
| SG17M | CDS | 3914557 | 3917208 | - | pfeA_5                         | 2651 | 4h | Ion transport, Iron transport, Transport                       |
| SG17M | CDS | 2911621 | 2913861 | - | pfeA_4                         | 2240 | 4h | Ion transport, Iron transport, Transport                       |
| NN2   | CDS | 3489723 | 3492374 | - | pfeA_2                         | 2651 | 4h | Ion transport, Iron transport, Transport                       |
| SG17M | CDS | 3940844 | 3943486 | + | cirA_7                         | 2642 | 4h | Ion transport, Iron transport, Transport                       |
| SG17M | CDS | 3914557 | 3917208 | - | pfeA_5                         | 2651 | 8h | Ion transport, Iron transport, Transport                       |
| NN2   | CDS | 3489723 | 3492374 | - | pfeA_2                         | 2651 | 8h | Ion transport, Iron transport, Transport                       |
| SG17M | CDS | 2540695 | 2541726 | - | hmuU_3                         | 1031 | 8h | Ion transport, Iron transport, Transport                       |
| SG17M | CDS | 3940844 | 3943486 | + | cirA_7                         | 2642 | 8h | Ion transport, Iron transport, Transport                       |
| NN2   | CDS | 4025438 | 4027546 | + | cirA_5                         | 2108 | 8h | Ion transport, Iron transport, Transport                       |
| SG17M | CDS | 5359827 | 5361143 | + | mntH_3                         | 1316 | 8h | Ion transport, Symport, Transport                              |
| NN2   | CDS | 6831241 | 6832050 | + | znuC_2                         | 809  | 4h | Ion transport, Transport, Zinc transport                       |

|       |      |         |         |   |        |      |    |                                                                                          |
|-------|------|---------|---------|---|--------|------|----|------------------------------------------------------------------------------------------|
| SG17M | CDS  | 798898  | 801312  | - | fhuA_4 | 2414 | 4h | Iron transport                                                                           |
| NN2   | CDS  | 574199  | 576613  | - | fhuA_1 | 2414 | 4h | Iron transport                                                                           |
| SG17M | CDS  | 798898  | 801312  | - | fhuA_4 | 2414 | 8h | Iron transport                                                                           |
| SG17M | CDS  | 489916  | 490731  | + | ioll_2 | 815  | 4h | Isomerase activity                                                                       |
| SG17M | exon | 1769180 | 1769274 | - | ispF   | 94   | 4h | Isoprene biosynthesis                                                                    |
| NN2   | CDS  | 5722271 | 5723215 | - | ispH_1 | 944  | 4h | Isoprene biosynthesis                                                                    |
| SG17M | CDS  | 5606703 | 5607479 | + | olsA   | 776  | 4h | Lipid biosynthesis, Lipid metabolism, Phospholipid biosynthesis, Phospholipid metabolism |
| SG17M | CDS  | 5717446 | 5717985 | + | kdsC_2 | 539  | 8h | Lipopolysaccharide biosynthesis                                                          |
| NN2   | CDS  | 5480939 | 5481478 | + | kdsC_1 | 539  | 8h | Lipopolysaccharide biosynthesis                                                          |
| SG17M | CDS  | 5717994 | 5718566 | + | lptC_2 | 572  | 8h | Lipopolysaccharide transport                                                             |
| NN2   | CDS  | 5481487 | 5482059 | + | lptC_1 | 572  | 8h | Lipopolysaccharide transport                                                             |
| NN2   | CDS  | 2432198 | 2433733 | - | Int_2  | 1535 | 4h | Lipoprotein biosynthesis                                                                 |
| NN2   | CDS  | 2432198 | 2433733 | - | Int_2  | 1535 | 8h | Lipoprotein biosynthesis                                                                 |
| SG17M | CDS  | 3082584 | 3083297 | + | merR   | 713  | 4h | Mercuric resistance, Transcription, Transcription regulation                             |
| SG17M | CDS  | 3082584 | 3083297 | + | merR   | 713  | 8h | Mercuric resistance, Transcription, Transcription regulation                             |
| SG17M | CDS  | 4754659 | 4755057 | + | phnB   | 398  | 4h | Methylation                                                                              |
| NN2   | CDS  | 5677502 | 5678368 | + | tam_5  | 866  | 4h | Methylation                                                                              |
| SG17M | CDS  | 768879  | 770162  | + | hyuC_2 | 1283 | 8h | Nitrogen compound metabolism                                                             |
| SG17M | CDS  | 4411392 | 4412285 | - | panS_4 | 893  | 4h | Pantothenate precursors transporter                                                      |
| NN2   | CDS  | 6325052 | 6326731 | + | phaC_1 | 1679 | 8h | PHB biosynthesis                                                                         |
| NN2   | CDS  | 687449  | 688018  | - | plsY_1 | 569  | 4h | Phospholipid biosynthetic process                                                        |
| SG17M | CDS  | 2913960 | 2915300 | - | pfeS_5 | 1340 | 4h | Phosphorelay signal transduction system                                                  |
| SG17M | CDS  | 2913960 | 2915300 | - | pfeS_5 | 1340 | 8h | Phosphorelay signal transduction system                                                  |
| NN2   | CDS  | 2690428 | 2691768 | - | pfeS_2 | 1340 | 8h | Phosphorelay signal transduction system                                                  |
| SG17M | CDS  | 1843050 | 1844807 | + | fruA_2 | 1757 | 8h | Phosphotransferase system, Sugar transport, Transport                                    |
| SG17M | CDS  | 5174807 | 5175079 | + | parD   | 272  | 4h | Plasmid partition, Toxin-antitoxin system, Transcription, Transcription regulation       |

|       |     |         |         |   |                           |      |    |                                                                                    |
|-------|-----|---------|---------|---|---------------------------|------|----|------------------------------------------------------------------------------------|
| NN2   | CDS | 4717348 | 4717620 | + | parD                      | 272  | 8h | Plasmid partition, Toxin-antitoxin system, Transcription, Transcription regulation |
| SG17M | CDS | 6193316 | 6194443 | + | speE_6                    | 1127 | 8h | Polyamine biosynthesis, Spermidine biosynthesis                                    |
| SG17M | CDS | 6739674 | 6741179 | + | ppx_2                     | 1505 | 4h | Polyphosphate catabolism                                                           |
| NN2   | CDS | 6539626 | 6541131 | + | ppx_1                     | 1505 | 4h | Polyphosphate catabolism                                                           |
| SG17M | CDS | 6739674 | 6741179 | + | ppx_2                     | 1505 | 8h | Polyphosphate catabolism                                                           |
| NN2   | CDS | 6539626 | 6541131 | + | ppx_1                     | 1505 | 8h | Polyphosphate catabolism                                                           |
| NN2   | CDS | 4100051 | 4101433 | + | hemN_1                    | 1382 | 4h | Porphyrin biosynthesis                                                             |
| SG17M | CDS | 2639666 | 2640727 | - | hemE_2                    | 1061 | 4h | Porphyrin biosynthesis                                                             |
| SG17M | CDS | 6741166 | 6743376 | - | ppk_2                     | 2210 | 4h | Protein autophosphorylation                                                        |
| NN2   | CDS | 6541118 | 6543328 | - | ppk_1                     | 2210 | 4h | Protein autophosphorylation                                                        |
| SG17M | CDS | 1469679 | 1472531 | - | valS_2                    | 2852 | 4h | Protein biosynthesis                                                               |
| SG17M | CDS | 1028300 | 1028797 | + | ssb_2                     | 497  | 8h | Protein biosynthesis                                                               |
| NN2   | CDS | 2750386 | 2752404 | - | putative phosphatase      | 2018 | 8h | Protein dephosphorylation                                                          |
| NN2   | CDS | 3870151 | 3870969 | + | ppsR_1                    | 818  | 8h | Protein dephosphorylation                                                          |
| SG17M | CDS | 4201789 | 4204077 | - | cis/trans isomerase       | 2288 | 4h | Protein folding                                                                    |
| SG17M | CDS | 4201789 | 4204077 | - | cis/trans isomerase       | 2288 | 8h | Protein folding                                                                    |
| NN2   | CDS | 877387  | 877668  | + | ppiC_1                    | 281  | 8h | Protein folding                                                                    |
| NN2   | CDS | 2101996 | 2102652 | - | xcpP_1                    | 656  | 4h | Protein secretion                                                                  |
| NN2   | CDS | 4659416 | 4660702 | - | puuB_10                   | 1286 | 4h | Putrescine catabolism                                                              |
| SG17M | CDS | 5416397 | 5418013 | + | nadB_2                    | 1616 | 4h | Pyridine nucleotide biosynthesis                                                   |
| NN2   | CDS | 5004148 | 5005764 | + | nadB_1                    | 1616 | 4h | Pyridine nucleotide biosynthesis                                                   |
| SG17M | CDS | 5416397 | 5418013 | + | nadB_2                    | 1616 | 8h | Pyridine nucleotide biosynthesis                                                   |
| NN2   | CDS | 2002825 | 2003829 | - | epd_2                     | 1004 | 8h | Pyridoxine biosynthesis                                                            |
| SG17M | CDS | 2395795 | 2396823 | + | pyrD_2                    | 1028 | 8h | Pyrimidine biosynthesis                                                            |
| SG17M | CDS | 193414  | 194751  | + | pyrC_3                    | 1337 | 8h | Pyrimidine biosynthesis                                                            |
| SG17M | CDS | 3071032 | 3072573 | - | deoA                      | 1541 | 4h | Pyrimidine metabolism                                                              |
| NN2   | CDS | 4774753 | 4775067 | + | transcriptional_regulator | 314  | 4h | Quorum sensing, Transcription, Transcription regulation                            |

|       |     |         |         |   |                           |      |    |                                                                 |
|-------|-----|---------|---------|---|---------------------------|------|----|-----------------------------------------------------------------|
| SG17M | CDS | 5232212 | 5232526 | + | transcriptional_regulator | 314  | 4h | Quorum sensing, Transcription, Transcription regulation         |
| SG17M | CDS | 6753823 | 6754857 | - | transcriptional_regulator | 1034 | 4h | Quorum sensing, Transcription, Transcription regulation         |
| SG17M | CDS | 5110717 | 5113260 | + | quiP_6                    | 2543 | 4h | Quorum sensing, Transcription, Transcription regulation         |
| NN2   | CDS | 4653258 | 4655801 | + | quiP_3                    | 2543 | 4h | Quorum sensing, Transcription, Transcription regulation         |
| NN2   | CDS | 5985388 | 5986161 | - | pdhR_1                    | 773  | 4h | Quorum sensing, Transcription, Transcription regulation         |
| SG17M | CDS | 3230849 | 3231781 | - | pcpR_12                   | 932  | 4h | Quorum sensing, Transcription, Transcription regulation         |
| NN2   | CDS | 4224670 | 4225389 | - | lasR_1                    | 719  | 4h | Quorum sensing, Transcription, Transcription regulation         |
| SG17M | CDS | 3043271 | 3044161 | - | hcaR_9                    | 890  | 4h | Quorum sensing, Transcription, Transcription regulation         |
| NN2   | CDS | 5193265 | 5194173 | - | hcaR_4                    | 908  | 4h | Quorum sensing, Transcription, Transcription regulation         |
| SG17M | CDS | 3418799 | 3419707 | + | hcaR_11                   | 908  | 4h | Quorum sensing, Transcription, Transcription regulation         |
| NN2   | CDS | 4224670 | 4225389 | - | lasR_1                    | 719  | 8h | Quorum sensing, Transcription, Transcription regulation         |
| NN2   | CDS | 5193265 | 5194173 | - | hcaR_4                    | 908  | 8h | Quorum sensing, Transcription, Transcription regulation         |
| SG17M | CDS | 3418799 | 3419707 | + | hcaR_11                   | 908  | 8h | Quorum sensing, Transcription, Transcription regulation         |
| SG17M | CDS | 5290082 | 5290495 | - | arfB_2                    | 413  | 4h | Rescue of stalled ribosome                                      |
| NN2   | CDS | 4832624 | 4833037 | - | arfB_1                    | 413  | 4h | Rescue of stalled ribosome                                      |
| SG17M | CDS | 5290082 | 5290495 | - | arfB_2                    | 413  | 8h | Rescue of stalled ribosome                                      |
| NN2   | CDS | 4634395 | 4634637 | + | ribosomal protein 30S-S3  | 242  | 4h | Ribonucleoprotein, Ribosomal protein, RNA-binding, rRNA-binding |
| SG17M | CDS | 6386678 | 6387697 | + | rsgA_2                    | 1019 | 4h | Ribosome biogenesis                                             |
| SG17M | CDS | 6386678 | 6387697 | + | rsgA_2                    | 1019 | 8h | Ribosome biogenesis                                             |
| NN2   | CDS | 6186619 | 6187638 | + | rsgA_1                    | 1019 | 8h | Ribosome biogenesis                                             |
| SG17M | CDS | 1930605 | 1931930 | + | rhlE_6                    | 1325 | 8h | Ribosome biogenesis                                             |
| SG17M | CDS | 1062293 | 1063297 | + | phzM_2                    | 1004 | 8h | Secondary metabolite biosynthesis                               |
| SG17M | CDS | 4363633 | 4364109 | + | yscO_2                    | 476  | 4h | Secretion protein                                               |
| NN2   | CDS | 3938311 | 3938787 | + | yscO_1                    | 476  | 4h | Secretion protein                                               |
| NN2   | CDS | 3938311 | 3938787 | + | yscO_1                    | 476  | 8h | Secretion protein                                               |
| SG17M | CDS | 2169505 | 2171253 | - | bluF_2                    | 1748 | 8h | Sensory transduction                                            |
| SG17M | CDS | 2078818 | 2085876 | - | dhbF_2                    | 7058 | 8h | Siderophore biosynthesis                                        |



|       |     |         |         |   |         |      |    |                                  |
|-------|-----|---------|---------|---|---------|------|----|----------------------------------|
| NN2   | CDS | 1853646 | 1860704 | - | dhbF_1  | 7058 | 8h | Siderophore biosynthesis         |
| SG17M | CDS | 2790310 | 2791335 | - | dgcT_5  | 1025 | 4h | Single-species biofilm formation |
| NN2   | CDS | 2566780 | 2567805 | - | dgcT_2  | 1025 | 4h | Single-species biofilm formation |
| SG17M | CDS | 1993620 | 1994237 | + | hasA_2  | 617  | 8h | Single-species biofilm formation |
| NN2   | CDS | 5205133 | 5205744 | + | hdeD-GI | 611  | 4h | Stress response                  |
| SG17M | CDS | 6692367 | 6694706 | + | yhgF_2  | 2339 | 4h | Stress response                  |
| NN2   | CDS | 6492318 | 6494657 | + | yhgF_1  | 2339 | 4h | Stress response                  |
| SG17M | CDS | 2635889 | 2636551 | - | sspA_3  | 662  | 4h | Stress response                  |
| NN2   | CDS | 2410709 | 2411371 | - | sspA_1  | 662  | 4h | Stress response                  |
| SG17M | CDS | 5839292 | 5841265 | + | rapA_7  | 1973 | 4h | Stress response                  |
| NN2   | CDS | 5602620 | 5604593 | + | rapA_4  | 1973 | 4h | Stress response                  |
| SG17M | CDS | 249252  | 250229  | - | qorA_4  | 977  | 4h | Stress response                  |
| SG17M | CDS | 125812  | 126372  | - | patZ_2  | 560  | 4h | Stress response                  |
| SG17M | CDS | 1038640 | 1044069 | + | mbtB_4  | 5429 | 4h | Stress response                  |
| SG17M | CDS | 6690021 | 6691340 | - | envZ_4  | 1319 | 4h | Stress response                  |
| SG17M | CDS | 6299922 | 6301187 | + | dnaK_4  | 1265 | 4h | Stress response                  |
| NN2   | CDS | 6099863 | 6101128 | + | dnaK_2  | 1265 | 4h | Stress response                  |
| NN2   | CDS | 5858057 | 5859157 | + | ychF_1  | 1100 | 8h | Stress response                  |
| NN2   | CDS | 161463  | 162515  | + | rihB_1  | 1052 | 8h | Stress response                  |
| SG17M | CDS | 5839292 | 5841265 | + | rapA_7  | 1973 | 8h | Stress response                  |
| NN2   | CDS | 5602620 | 5604593 | + | rapA_4  | 1973 | 8h | Stress response                  |
| NN2   | CDS | 6804085 | 6804645 | - | patZ_1  | 560  | 8h | Stress response                  |
| SG17M | CDS | 6473534 | 6474181 | + | mrsA_2  | 647  | 8h | Stress response                  |
| NN2   | CDS | 4986845 | 4989244 | + | lon_2   | 2399 | 8h | Stress response                  |
| NN2   | CDS | 3252559 | 3254103 | - | htpX_2  | 1544 | 8h | Stress response                  |
| SG17M | CDS | 6690021 | 6691340 | - | envZ_4  | 1319 | 8h | Stress response                  |
| SG17M | CDS | 6299922 | 6301187 | + | dnaK_4  | 1265 | 8h | Stress response                  |

|       |     |         |         |   |                                       |       |    |                                                                          |
|-------|-----|---------|---------|---|---------------------------------------|-------|----|--------------------------------------------------------------------------|
| NN2   | CDS | 6686080 | 6687765 | - | betA_2                                | 1685  | 8h | Stress response                                                          |
| SG17M | CDS | 649087  | 651366  | + | ptsP_2                                | 2279  | 4h | Sugar phosphotransferase system                                          |
| NN2   | CDS | 425074  | 426666  | + | ptsP_1                                | 1592  | 8h | Sugar phosphotransferase system                                          |
| SG17M | CDS | 6723290 | 6723901 | + | ygfA_2                                | 611   | 4h | Tetrahydrofolate interconversion                                         |
| SG17M | CDS | 6723290 | 6723901 | + | ygfA_2                                | 611   | 8h | Tetrahydrofolate interconversion                                         |
| SG17M | CDS | 3336327 | 3339095 | - | rhsC_6                                | 2768  | 4h | Toxin activity                                                           |
| NN2   | CDS | 2997603 | 3000371 | - | rhsC_3                                | 2768  | 4h | Toxin activity                                                           |
| NN2   | CDS | 2694869 | 2698822 | + | rhsC_2                                | 3953  | 4h | Toxin activity                                                           |
| NN2   | CDS | 1807232 | 1809943 | + | rhsC_1                                | 2711  | 4h | Toxin activity                                                           |
| SG17M | CDS | 267598  | 278130  | + | cdiA_2                                | 10532 | 4h | Toxin activity                                                           |
| NN2   | CDS | 42903   | 53435   | + | cdiA_1                                | 10532 | 4h | Toxin activity                                                           |
| NN2   | CDS | 2997603 | 3000371 | - | rhsC_3                                | 2768  | 8h | Toxin activity                                                           |
| NN2   | CDS | 2694869 | 2698822 | + | rhsC_2                                | 3953  | 8h | Toxin activity                                                           |
| NN2   | CDS | 1807232 | 1809943 | + | rhsC_1                                | 2711  | 8h | Toxin activity                                                           |
| NN2   | CDS | 6383978 | 6385918 | - | estA_1                                | 1940  | 8h | Toxin activity                                                           |
| SG17M | CDS | 5848323 | 5849903 | + | tcpT_2                                | 1580  | 4h | Toxin coregulated pilus biosynthesis                                     |
| NN2   | CDS | 5634713 | 5636293 | + | tcpT_1                                | 1580  | 4h | Toxin coregulated pilus biosynthesis                                     |
| SG17M | CDS | 5848323 | 5849903 | + | tcpT_2                                | 1580  | 8h | Toxin coregulated pilus biosynthesis                                     |
| NN2   | CDS | 5634713 | 5636293 | + | tcpT_1                                | 1580  | 8h | Toxin coregulated pilus biosynthesis                                     |
| SG17M | CDS | 5348132 | 5348833 | + | vrr-nuc-domain containing protein     | 701   | 4h | Transcription, Transcription regulation, Two-component regulatory system |
| NN2   | CDS | 6160799 | 6162700 | + | diguanylate cyclase/phosphodiesterase | 1901  | 4h | Transcription, Transcription regulation, Two-component regulatory system |
| SG17M | CDS | 6360858 | 6362759 | + | diguanylate cyclase/phosphodiesterase | 1901  | 4h | Transcription, Transcription regulation, Two-component regulatory system |
| SG17M | CDS | 2135970 | 2136485 | - | ankrd33                               | 515   | 4h | Transcription, Transcription regulation, Two-component regulatory system |
| NN2   | CDS | 6232857 | 6233456 | + | puuR_2                                | 599   | 4h | Transcription, Transcription regulation, Two-component regulatory system |
| SG17M | CDS | 3053807 | 3054961 | + | cusS_4                                | 1154  | 4h | Transcription, Transcription regulation, Two-component regulatory system |

|       |      |         |         |   |                                       |      |    |                                                                          |
|-------|------|---------|---------|---|---------------------------------------|------|----|--------------------------------------------------------------------------|
| SG17M | CDS  | 3052861 | 3053553 | + | cusR                                  | 692  | 4h | Transcription, Transcription regulation, Two-component regulatory system |
| SG17M | CDS  | 1826496 | 1827134 | - | bepR_2                                | 638  | 4h | Transcription, Transcription regulation, Two-component regulatory system |
| NN2   | CDS  | 6081933 | 6084761 | + | barA_6                                | 2828 | 4h | Transcription, Transcription regulation, Two-component regulatory system |
| SG17M | CDS  | 5224008 | 5226785 | + | barA_11                               | 2777 | 4h | Transcription, Transcription regulation, Two-component regulatory system |
| NN2   | CDS  | 6160799 | 6162700 | + | diguanylate cyclase/phosphodiesterase | 1901 | 8h | Transcription, Transcription regulation, Two-component regulatory system |
| SG17M | CDS  | 2336346 | 2337383 | - | araC                                  | 1037 | 8h | Transcription, Transcription regulation, Two-component regulatory system |
| SG17M | CDS  | 4784091 | 4784999 | + | pgrR_16                               | 908  | 8h | Transcription, Transcription regulation, Two-component regulatory system |
| SG17M | CDS  | 3161660 | 3163003 | - | hupR1_4                               | 1343 | 8h | Transcription, Transcription regulation, Two-component regulatory system |
| SG17M | CDS  | 1459006 | 1459902 | - | gcvA_13                               | 896  | 8h | Transcription, Transcription regulation, Two-component regulatory system |
| SG17M | CDS  | 3052861 | 3053553 | + | cusR                                  | 692  | 8h | Transcription, Transcription regulation, Two-component regulatory system |
| SG17M | CDS  | 80377   | 81327   | + | cmpR_5                                | 950  | 8h | Transcription, Transcription regulation, Two-component regulatory system |
| SG17M | CDS  | 5224008 | 5226785 | + | barA_11                               | 2777 | 8h | Transcription, Transcription regulation, Two-component regulatory system |
| NN2   | CDS  | 6474727 | 6475134 | + | transmembrane_protein                 | 407  | 4h | Transmembrane transporter activity                                       |
| SG17M | CDS  | 3296265 | 3297491 | - | yycB_5                                | 1226 | 4h | Transmembrane transporter activity                                       |
| NN2   | CDS  | 6515397 | 6516590 | + | ynfM_2                                | 1193 | 4h | Transmembrane transporter activity                                       |
| SG17M | CDS  | 6724736 | 6725860 | - | yhhJ_2                                | 1124 | 4h | Transmembrane transporter activity                                       |
| SG17M | CDS  | 3296265 | 3297491 | - | yycB_5                                | 1226 | 8h | Transmembrane transporter activity                                       |
| SG17M | CDS  | 4410189 | 4411385 | + | ycdO_2                                | 1196 | 8h | Transmembrane transporter activity                                       |
| NN2   | CDS  | 884433  | 886841  | - | fpvA_1                                | 2408 | 8h | Transmembrane transporter activity                                       |
| SG17M | exon | 989564  | 989648  | + | tRNA-TyrGTA                           | 84   | 4h | tRNA                                                                     |
| SG17M | exon | 989768  | 989843  | + | tRNA-ThrGGT                           | 75   | 4h | tRNA                                                                     |
| NN2   | exon | 5577611 | 5577710 | - | tRNA-LysTTT-pseudo                    | 99   | 4h | tRNA                                                                     |
| SG17M | exon | 5814283 | 5814362 | - | tRNA-LysTTT-pseudo                    | 79   | 4h | tRNA                                                                     |
| NN2   | exon | 5704205 | 5704280 | - | tRNA-LysTTT                           | 75   | 4h | tRNA                                                                     |

|       |      |         |         |   |                                                       |      |    |                                  |
|-------|------|---------|---------|---|-------------------------------------------------------|------|----|----------------------------------|
| SG17M | exon | 5917817 | 5917892 | - | tRNA-LysTTT                                           | 75   | 4h | tRNA                             |
| SG17M | exon | 989675  | 989748  | + | tRNA-GlyTCC                                           | 73   | 4h | tRNA                             |
| NN2   | exon | 764865  | 764949  | + | tRNA-TyrGTA                                           | 84   | 8h | tRNA                             |
| NN2   | exon | 765069  | 765144  | + | tRNA-ThrGGT                                           | 75   | 8h | tRNA                             |
| SG17M | exon | 989768  | 989843  | + | tRNA-ThrGGT                                           | 75   | 8h | tRNA                             |
| NN2   | exon | 5577611 | 5577710 | - | tRNA-LysTTT-pseudo                                    | 99   | 8h | tRNA                             |
| SG17M | exon | 5814283 | 5814362 | - | tRNA-LysTTT-pseudo                                    | 79   | 8h | tRNA                             |
| NN2   | exon | 5704205 | 5704280 | - | tRNA-LysTTT                                           | 75   | 8h | tRNA                             |
| SG17M | exon | 5179331 | 5179406 | - | tRNA-LysTTT                                           | 75   | 8h | tRNA                             |
| NN2   | exon | 6171300 | 6171386 | + | tRNA-LeuCAG                                           | 86   | 8h | tRNA                             |
| NN2   | exon | 764976  | 765049  | + | tRNA-GlyTCC                                           | 73   | 8h | tRNA                             |
| SG17M | exon | 989675  | 989748  | + | tRNA-GlyTCC                                           | 73   | 8h | tRNA                             |
| NN2   | CDS  | 4233066 | 4233677 | - | tRNA-uridine_aminocarboxypropyltransferase            | 611  | 4h | tRNA processing                  |
| SG17M | CDS  | 6384905 | 6385990 | + | queG_2                                                | 1085 | 4h | tRNA processing                  |
| NN2   | CDS  | 3275900 | 3277207 | - | ttuB_1                                                | 1307 | 8h | tRNA processing                  |
| SG17M | CDS  | 6384905 | 6385990 | + | queG_2                                                | 1085 | 8h | tRNA processing                  |
| NN2   | CDS  | 5683932 | 5684282 | + | type_II_toxin-antitoxin_system_RelE/ParE_family_toxin | 350  | 8h | Type II toxin-antitoxin system   |
| NN2   | CDS  | 5717363 | 5717950 | + | PilX                                                  | 587  | 4h | Type IV pilus biogenesis         |
| SG17M | CDS  | 5931574 | 5935065 | + | pilY1_2                                               | 3491 | 8h | Type IV pilus biogenesis         |
| NN2   | CDS  | 5717962 | 5721453 | + | pilY1                                                 | 3491 | 8h | Type IV pilus biogenesis         |
| SG17M | CDS  | 6717536 | 6718753 | - | ubil_2                                                | 1217 | 8h | Ubiquinone biosynthesis          |
| NN2   | CDS  | 6517487 | 6518704 | - | ubil_1                                                | 1217 | 8h | Ubiquinone biosynthesis          |
| SG17M | CDS  | 6864074 | 6864964 | + | ubiA_2                                                | 890  | 8h | Ubiquinone biosynthesis          |
| NN2   | CDS  | 6664024 | 6664914 | + | ubiA_1                                                | 890  | 8h | Ubiquinone biosynthesis          |
| SG17M | CDS  | 1599587 | 1601251 | - | uncharacterised/unknown                               | 1664 | 4h | Uncharacterised/Hypothetical/duf |
| NN2   | CDS  | 706140  | 707201  | - | uncharacterised/unknown                               | 1061 | 4h | Uncharacterised/Hypothetical/duf |
| SG17M | CDS  | 3167160 | 3169496 | - | uncharacterised/unknown                               | 2336 | 4h | Uncharacterised/Hypothetical/duf |

|       |      |         |         |   |                         |      |    |                                  |
|-------|------|---------|---------|---|-------------------------|------|----|----------------------------------|
| SG17M | CDS  | 5156755 | 5157756 | - | uncharacterised/unknown | 1001 | 4h | Uncharacterised/Hypothetical/duf |
| SG17M | CDS  | 173076  | 173819  | + | uncharacterised/unknown | 743  | 4h | Uncharacterised/Hypothetical/duf |
| NN2   | CDS  | 8660    | 10366   | + | uncharacterised/unknown | 1706 | 4h | Uncharacterised/Hypothetical/duf |
| NN2   | CDS  | 73381   | 74508   | + | uncharacterised/unknown | 1127 | 4h | Uncharacterised/Hypothetical/duf |
| NN2   | CDS  | 162543  | 163169  | - | uncharacterised/unknown | 626  | 4h | Uncharacterised/Hypothetical/duf |
| NN2   | CDS  | 431343  | 432140  | - | uncharacterised/unknown | 797  | 4h | Uncharacterised/Hypothetical/duf |
| NN2   | CDS  | 471268  | 472614  | + | uncharacterised/unknown | 1346 | 4h | Uncharacterised/Hypothetical/duf |
| NN2   | CDS  | 766626  | 767003  | - | uncharacterised/unknown | 377  | 4h | Uncharacterised/Hypothetical/duf |
| NN2   | exon | 768760  | 768952  | - | uncharacterised/unknown | 192  | 4h | Uncharacterised/Hypothetical/duf |
| NN2   | CDS  | 1195031 | 1195132 | - | uncharacterised/unknown | 101  | 4h | Uncharacterised/Hypothetical/duf |
| NN2   | CDS  | 1328988 | 1329584 | - | uncharacterised/unknown | 596  | 4h | Uncharacterised/Hypothetical/duf |
| NN2   | CDS  | 1374884 | 1376548 | - | uncharacterised/unknown | 1664 | 4h | Uncharacterised/Hypothetical/duf |
| NN2   | CDS  | 1598853 | 1599680 | - | uncharacterised/unknown | 827  | 4h | Uncharacterised/Hypothetical/duf |
| NN2   | CDS  | 1949427 | 1950077 | - | uncharacterised/unknown | 650  | 4h | Uncharacterised/Hypothetical/duf |
| NN2   | CDS  | 1993452 | 1993931 | - | uncharacterised/unknown | 479  | 4h | Uncharacterised/Hypothetical/duf |
| NN2   | CDS  | 2630649 | 2630837 | - | uncharacterised/unknown | 188  | 4h | Uncharacterised/Hypothetical/duf |
| NN2   | CDS  | 2630884 | 2631804 | - | uncharacterised/unknown | 920  | 4h | Uncharacterised/Hypothetical/duf |
| NN2   | CDS  | 2828437 | 2830773 | - | uncharacterised/unknown | 2336 | 4h | Uncharacterised/Hypothetical/duf |
| NN2   | CDS  | 2857837 | 2858151 | - | uncharacterised/unknown | 314  | 4h | Uncharacterised/Hypothetical/duf |
| NN2   | CDS  | 2866620 | 2866844 | - | uncharacterised/unknown | 224  | 4h | Uncharacterised/Hypothetical/duf |
| NN2   | CDS  | 2871217 | 2872419 | - | uncharacterised/unknown | 1202 | 4h | Uncharacterised/Hypothetical/duf |
| NN2   | CDS  | 3020203 | 3020907 | - | uncharacterised/unknown | 704  | 4h | Uncharacterised/Hypothetical/duf |
| NN2   | CDS  | 3211283 | 3211648 | - | uncharacterised/unknown | 365  | 4h | Uncharacterised/Hypothetical/duf |
| NN2   | CDS  | 3467936 | 3468916 | + | uncharacterised/unknown | 980  | 4h | Uncharacterised/Hypothetical/duf |
| NN2   | CDS  | 3771482 | 3771757 | + | uncharacterised/unknown | 275  | 4h | Uncharacterised/Hypothetical/duf |
| NN2   | CDS  | 3790645 | 3791520 | + | uncharacterised/unknown | 875  | 4h | Uncharacterised/Hypothetical/duf |
| NN2   | CDS  | 3961434 | 3964961 | - | uncharacterised/unknown | 3527 | 4h | Uncharacterised/Hypothetical/duf |

|     |      |         |         |   |                         |      |    |                                  |
|-----|------|---------|---------|---|-------------------------|------|----|----------------------------------|
| NN2 | CDS  | 4896525 | 4896839 | + | uncharacterised/unknown | 314  | 4h | Uncharacterised/Hypothetical/duf |
| NN2 | CDS  | 4935370 | 4935888 | + | uncharacterised/unknown | 518  | 4h | Uncharacterised/Hypothetical/duf |
| NN2 | CDS  | 4935885 | 4936586 | + | uncharacterised/unknown | 701  | 4h | Uncharacterised/Hypothetical/duf |
| NN2 | CDS  | 5067115 | 5067864 | + | uncharacterised/unknown | 749  | 4h | Uncharacterised/Hypothetical/duf |
| NN2 | CDS  | 5344189 | 5344548 | - | uncharacterised/unknown | 359  | 4h | Uncharacterised/Hypothetical/duf |
| NN2 | CDS  | 5370194 | 5370970 | + | uncharacterised/unknown | 776  | 4h | Uncharacterised/Hypothetical/duf |
| NN2 | CDS  | 5584207 | 5584887 | + | uncharacterised/unknown | 680  | 4h | Uncharacterised/Hypothetical/duf |
| NN2 | CDS  | 5590722 | 5592053 | + | uncharacterised/unknown | 1331 | 4h | Uncharacterised/Hypothetical/duf |
| NN2 | CDS  | 5606105 | 5606869 | - | uncharacterised/unknown | 764  | 4h | Uncharacterised/Hypothetical/duf |
| NN2 | CDS  | 5628279 | 5629043 | - | uncharacterised/unknown | 764  | 4h | Uncharacterised/Hypothetical/duf |
| NN2 | CDS  | 5664407 | 5665516 | + | uncharacterised/unknown | 1109 | 4h | Uncharacterised/Hypothetical/duf |
| NN2 | CDS  | 5696313 | 5698331 | + | uncharacterised/unknown | 2018 | 4h | Uncharacterised/Hypothetical/duf |
| NN2 | CDS  | 5997822 | 5998388 | - | uncharacterised/unknown | 566  | 4h | Uncharacterised/Hypothetical/duf |
| NN2 | CDS  | 6065541 | 6065672 | + | uncharacterised/unknown | 131  | 4h | Uncharacterised/Hypothetical/duf |
| NN2 | CDS  | 6096317 | 6097684 | + | uncharacterised/unknown | 1367 | 4h | Uncharacterised/Hypothetical/duf |
| NN2 | CDS  | 6287265 | 6288080 | + | uncharacterised/unknown | 815  | 4h | Uncharacterised/Hypothetical/duf |
| NN2 | CDS  | 6356191 | 6356862 | - | uncharacterised/unknown | 671  | 4h | Uncharacterised/Hypothetical/duf |
| NN2 | CDS  | 6356920 | 6359157 | - | uncharacterised/unknown | 2237 | 4h | Uncharacterised/Hypothetical/duf |
| NN2 | CDS  | 6442131 | 6443111 | + | uncharacterised/unknown | 980  | 4h | Uncharacterised/Hypothetical/duf |
| NN2 | exon | 6473815 | 6474213 | - | uncharacterised/unknown | 398  | 4h | Uncharacterised/Hypothetical/duf |
| NN2 | CDS  | 6476182 | 6476625 | - | uncharacterised/unknown | 443  | 4h | Uncharacterised/Hypothetical/duf |
| NN2 | CDS  | 6501767 | 6502444 | - | uncharacterised/unknown | 677  | 4h | Uncharacterised/Hypothetical/duf |
| NN2 | CDS  | 6516629 | 6517450 | + | uncharacterised/unknown | 821  | 4h | Uncharacterised/Hypothetical/duf |
| NN2 | CDS  | 6524219 | 6524677 | + | uncharacterised/unknown | 458  | 4h | Uncharacterised/Hypothetical/duf |
| NN2 | CDS  | 6606006 | 6607934 | - | uncharacterised/unknown | 1928 | 4h | Uncharacterised/Hypothetical/duf |
| NN2 | CDS  | 6664938 | 6665321 | - | uncharacterised/unknown | 383  | 4h | Uncharacterised/Hypothetical/duf |
| NN2 | CDS  | 6802706 | 6804079 | + | uncharacterised/unknown | 1373 | 4h | Uncharacterised/Hypothetical/duf |

|       |      |         |         |   |                         |      |    |                                  |
|-------|------|---------|---------|---|-------------------------|------|----|----------------------------------|
| NN2   | CDS  | 6806451 | 6807491 | + | uncharacterised/unknown | 1040 | 4h | Uncharacterised/Hypothetical/duf |
| NN2   | CDS  | 6851349 | 6852092 | + | uncharacterised/unknown | 743  | 4h | Uncharacterised/Hypothetical/duf |
| NN2   | exon | 4810150 | 4810659 | + | uncharacterised/unknown | 509  | 4h | Uncharacterised/Hypothetical/duf |
| NN2   | exon | 5976006 | 5976084 | + | uncharacterised/unknown | 78   | 4h | Uncharacterised/Hypothetical/duf |
| NN2   | exon | 6310557 | 6310850 | - | uncharacterised/unknown | 293  | 4h | Uncharacterised/Hypothetical/duf |
| SG17M | exon | 88069   | 88160   | + | uncharacterised/unknown | 91   | 4h | Uncharacterised/Hypothetical/duf |
| SG17M | exon | 405324  | 405447  | - | uncharacterised/unknown | 123  | 4h | Uncharacterised/Hypothetical/duf |
| SG17M | CDS  | 548888  | 552019  | + | uncharacterised/unknown | 3131 | 4h | Uncharacterised/Hypothetical/duf |
| SG17M | exon | 604253  | 604432  | - | uncharacterised/unknown | 179  | 4h | Uncharacterised/Hypothetical/duf |
| SG17M | CDS  | 656043  | 656840  | - | uncharacterised/unknown | 797  | 4h | Uncharacterised/Hypothetical/duf |
| SG17M | CDS  | 852731  | 854569  | + | uncharacterised/unknown | 1838 | 4h | Uncharacterised/Hypothetical/duf |
| SG17M | CDS  | 930841  | 931902  | - | uncharacterised/unknown | 1061 | 4h | Uncharacterised/Hypothetical/duf |
| SG17M | CDS  | 945784  | 945954  | - | uncharacterised/unknown | 170  | 4h | Uncharacterised/Hypothetical/duf |
| SG17M | CDS  | 991325  | 991702  | - | uncharacterised/unknown | 377  | 4h | Uncharacterised/Hypothetical/duf |
| SG17M | exon | 993459  | 993651  | - | uncharacterised/unknown | 192  | 4h | Uncharacterised/Hypothetical/duf |
| SG17M | CDS  | 1823566 | 1824393 | - | uncharacterised/unknown | 827  | 4h | Uncharacterised/Hypothetical/duf |
| SG17M | CDS  | 2218623 | 2219102 | - | uncharacterised/unknown | 479  | 4h | Uncharacterised/Hypothetical/duf |
| SG17M | CDS  | 2824856 | 2825413 | + | uncharacterised/unknown | 557  | 4h | Uncharacterised/Hypothetical/duf |
| SG17M | CDS  | 2854181 | 2854369 | - | uncharacterised/unknown | 188  | 4h | Uncharacterised/Hypothetical/duf |
| SG17M | CDS  | 2854416 | 2855336 | - | uncharacterised/unknown | 920  | 4h | Uncharacterised/Hypothetical/duf |
| SG17M | CDS  | 3196560 | 3196874 | - | uncharacterised/unknown | 314  | 4h | Uncharacterised/Hypothetical/duf |
| SG17M | CDS  | 3358927 | 3359631 | - | uncharacterised/unknown | 704  | 4h | Uncharacterised/Hypothetical/duf |
| SG17M | CDS  | 3676771 | 3677406 | - | uncharacterised/unknown | 635  | 4h | Uncharacterised/Hypothetical/duf |
| SG17M | CDS  | 3892770 | 3893750 | + | uncharacterised/unknown | 980  | 4h | Uncharacterised/Hypothetical/duf |
| SG17M | CDS  | 4386743 | 4390270 | - | uncharacterised/unknown | 3527 | 4h | Uncharacterised/Hypothetical/duf |
| SG17M | CDS  | 4519545 | 4520306 | - | uncharacterised/unknown | 761  | 4h | Uncharacterised/Hypothetical/duf |
| SG17M | CDS  | 5241834 | 5242226 | + | uncharacterised/unknown | 392  | 4h | Uncharacterised/Hypothetical/duf |

|       |      |         |         |   |                                   |      |    |                                  |
|-------|------|---------|---------|---|-----------------------------------|------|----|----------------------------------|
| SG17M | CDS  | 5262082 | 5262342 | + | uncharacterised/unknown           | 260  | 4h | Uncharacterised/Hypothetical/duf |
| SG17M | exon | 5267608 | 5268117 | + | uncharacterised/unknown           | 509  | 4h | Uncharacterised/Hypothetical/duf |
| SG17M | CDS  | 5648141 | 5649109 | - | uncharacterised/unknown           | 968  | 4h | Uncharacterised/Hypothetical/duf |
| SG17M | CDS  | 5827394 | 5828725 | + | uncharacterised/unknown           | 1331 | 4h | Uncharacterised/Hypothetical/duf |
| SG17M | CDS  | 5828670 | 5829629 | - | uncharacterised/unknown           | 959  | 4h | Uncharacterised/Hypothetical/duf |
| SG17M | CDS  | 5830782 | 5831330 | + | uncharacterised/unknown           | 548  | 4h | Uncharacterised/Hypothetical/duf |
| SG17M | CDS  | 5837406 | 5839295 | + | uncharacterised/unknown           | 1889 | 4h | Uncharacterised/Hypothetical/duf |
| SG17M | CDS  | 5878019 | 5879128 | + | uncharacterised/unknown           | 1109 | 4h | Uncharacterised/Hypothetical/duf |
| SG17M | CDS  | 6298058 | 6298759 | + | uncharacterised/unknown           | 701  | 4h | Uncharacterised/Hypothetical/duf |
| SG17M | CDS  | 6766093 | 6769362 | - | uncharacterised/unknown           | 3269 | 4h | Uncharacterised/Hypothetical/duf |
| NN2   | CDS  | 6553299 | 6553778 | + | TIGR02444_family_protein          | 479  | 4h | Uncharacterised/Hypothetical/duf |
| SG17M | CDS  | 6753347 | 6753826 | + | TIGR02444_family_protein          | 479  | 4h | Uncharacterised/Hypothetical/duf |
| SG17M | CDS  | 1228177 | 1228533 | - | SirB                              | 356  | 4h | Uncharacterised/Hypothetical/duf |
| SG17M | CDS  | 4692255 | 4692464 | + | regulatory protein                | 209  | 4h | Uncharacterised/Hypothetical/duf |
| NN2   | CDS  | 1254899 | 1255396 | - | rdd domain-containing protein     | 497  | 4h | Uncharacterised/Hypothetical/duf |
| SG17M | CDS  | 3209942 | 3211144 | - | putative integrase                | 1202 | 4h | Uncharacterised/Hypothetical/duf |
| SG17M | CDS  | 298076  | 299203  | + | putative aminopeptidase           | 1127 | 4h | Uncharacterised/Hypothetical/duf |
| SG17M | CDS  | 1383705 | 1385096 | + | PINc domain-containing protein    | 1391 | 4h | Uncharacterised/Hypothetical/duf |
| SG17M | CDS  | 5831377 | 5832216 | + | phage regulatory protein          | 839  | 4h | Uncharacterised/Hypothetical/duf |
| NN2   | CDS  | 4036406 | 4037311 | + | pbbp_domain-containing_protein    | 905  | 4h | Uncharacterised/Hypothetical/duf |
| SG17M | CDS  | 2167493 | 2168239 | - | pbbp_domain-containing_protein    | 746  | 4h | Uncharacterised/Hypothetical/duf |
| SG17M | CDS  | 5175083 | 5175433 | + | parE                              | 350  | 4h | Uncharacterised/Hypothetical/duf |
| SG17M | CDS  | 5347617 | 5348135 | + | paar_domain-containing_protein    | 518  | 4h | Uncharacterised/Hypothetical/duf |
| SG17M | CDS  | 124433  | 125806  | + | insulinase_family_metalloprotease | 1373 | 4h | Uncharacterised/Hypothetical/duf |
| NN2   | CDS  | 53669   | 53782   | - | hypothetical_protein              | 113  | 4h | Uncharacterised/Hypothetical/duf |
| NN2   | CDS  | 72379   | 72816   | - | hypothetical_protein              | 437  | 4h | Uncharacterised/Hypothetical/duf |
| NN2   | CDS  | 1598515 | 1598856 | - | hypothetical_protein              | 341  | 4h | Uncharacterised/Hypothetical/duf |



|       |     |         |         |   |                                         |      |    |                                  |
|-------|-----|---------|---------|---|-----------------------------------------|------|----|----------------------------------|
| NN2   | CDS | 5591998 | 5592957 | - | hypothetical_protein                    | 959  | 4h | Uncharacterised/Hypothetical/duf |
| SG17M | CDS | 4215965 | 4216840 | + | hydrolase-4 domain-containing protein   | 875  | 4h | Uncharacterised/Hypothetical/duf |
| SG17M | CDS | 1664659 | 1665300 | - | hth_tetR-type_domain-containing_protein | 641  | 4h | Uncharacterised/Hypothetical/duf |
| SG17M | CDS | 2174598 | 2175248 | - | had_phosphoserine_phosphatase           | 650  | 4h | Uncharacterised/Hypothetical/duf |
| SG17M | CDS | 3128678 | 3129502 | - | GTPase                                  | 824  | 4h | Uncharacterised/Hypothetical/duf |
| SG17M | CDS | 306175  | 307887  | - | fge-domain containing sulfatase         | 1712 | 4h | Uncharacterised/Hypothetical/duf |
| SG17M | CDS | 5664916 | 5665377 | + | duf721                                  | 461  | 4h | Uncharacterised/Hypothetical/duf |
| NN2   | CDS | 5428409 | 5428870 | + | duf721                                  | 461  | 4h | Uncharacterised/Hypothetical/duf |
| NN2   | CDS | 1292986 | 1293381 | - | duf4345                                 | 395  | 4h | Uncharacterised/Hypothetical/duf |
| SG17M | CDS | 5244051 | 5244566 | + | duf4124                                 | 515  | 4h | Uncharacterised/Hypothetical/duf |
| SG17M | CDS | 6600665 | 6601186 | + | duf4124                                 | 521  | 4h | Uncharacterised/Hypothetical/duf |
| NN2   | CDS | 6400617 | 6401138 | + | duf4124                                 | 521  | 4h | Uncharacterised/Hypothetical/duf |
| SG17M | CDS | 113113  | 115071  | + | duf4105                                 | 1958 | 4h | Uncharacterised/Hypothetical/duf |
| NN2   | CDS | 6791386 | 6793344 | + | duf4105                                 | 1958 | 4h | Uncharacterised/Hypothetical/duf |
| NN2   | CDS | 3573194 | 3573418 | + | duf3203                                 | 224  | 4h | Uncharacterised/Hypothetical/duf |
| NN2   | CDS | 1081481 | 1082242 | + | duf218                                  | 761  | 4h | Uncharacterised/Hypothetical/duf |
| SG17M | CDS | 2051346 | 2051957 | + | duf2064                                 | 611  | 4h | Uncharacterised/Hypothetical/duf |
| SG17M | CDS | 954693  | 958307  | + | duf1983                                 | 3614 | 4h | Uncharacterised/Hypothetical/duf |
| NN2   | CDS | 729992  | 733606  | + | duf1983                                 | 3614 | 4h | Uncharacterised/Hypothetical/duf |
| NN2   | CDS | 6774383 | 6774586 | + | duf1127                                 | 203  | 4h | Uncharacterised/Hypothetical/duf |
| NN2   | CDS | 416503  | 416835  | - | duf0339                                 | 332  | 4h | Uncharacterised/Hypothetical/duf |
| NN2   | CDS | 5953613 | 5953810 | - | duf0337                                 | 197  | 4h | Uncharacterised/Hypothetical/duf |
| NN2   | CDS | 5674450 | 5675106 | + | dsba-like thioredoxin domain protein    | 656  | 4h | Uncharacterised/Hypothetical/duf |
| SG17M | CDS | 5888062 | 5888718 | + | dsba-like thioredoxin domain protein    | 656  | 4h | Uncharacterised/Hypothetical/duf |
| NN2   | CDS | 4221642 | 4223594 | + | diguanylate cyclase/phosphodiesterase   | 1952 | 4h | Uncharacterised/Hypothetical/duf |
| NN2   | CDS | 4639186 | 4640067 | - | yiaD_3                                  | 881  | 4h | Uncharacterised/Hypothetical/duf |
| SG17M | CDS | 5091202 | 5091666 | - | slyB_2                                  | 464  | 4h | Uncharacterised/Hypothetical/duf |

|       |     |         |         |   |                                 |      |    |                                  |
|-------|-----|---------|---------|---|---------------------------------|------|----|----------------------------------|
| NN2   | CDS | 3957995 | 3958540 | + | foIE_2                          | 545  | 4h | Uncharacterised/Hypothetical/duf |
| SG17M | CDS | 4020711 | 4021481 | + | bdhA_2                          | 770  | 4h | Uncharacterised/Hypothetical/duf |
| SG17M | CDS | 1834495 | 1835508 | - | zinc-type alcohol dehydrogenase | 1013 | 8h | Uncharacterised/Hypothetical/duf |
| SG17M | CDS | 2204062 | 2204379 | + | uncharacterised/unknown         | 317  | 8h | Uncharacterised/Hypothetical/duf |
| SG17M | CDS | 1599587 | 1601251 | - | uncharacterised/unknown         | 1664 | 8h | Uncharacterised/Hypothetical/duf |
| SG17M | CDS | 2442253 | 2442486 | + | uncharacterised/unknown         | 233  | 8h | Uncharacterised/Hypothetical/duf |
| SG17M | CDS | 6346136 | 6346831 | - | uncharacterised/unknown         | 695  | 8h | Uncharacterised/Hypothetical/duf |
| SG17M | CDS | 3167160 | 3169496 | - | uncharacterised/unknown         | 2336 | 8h | Uncharacterised/Hypothetical/duf |
| SG17M | CDS | 173076  | 173819  | + | uncharacterised/unknown         | 743  | 8h | Uncharacterised/Hypothetical/duf |
| NN2   | CDS | 73381   | 74508   | + | uncharacterised/unknown         | 1127 | 8h | Uncharacterised/Hypothetical/duf |
| NN2   | CDS | 162543  | 163169  | - | uncharacterised/unknown         | 626  | 8h | Uncharacterised/Hypothetical/duf |
| NN2   | CDS | 283366  | 284067  | - | uncharacterised/unknown         | 701  | 8h | Uncharacterised/Hypothetical/duf |
| NN2   | CDS | 431343  | 432140  | - | uncharacterised/unknown         | 797  | 8h | Uncharacterised/Hypothetical/duf |
| NN2   | CDS | 766626  | 767003  | - | uncharacterised/unknown         | 377  | 8h | Uncharacterised/Hypothetical/duf |
| NN2   | CDS | 1159002 | 1160393 | + | uncharacterised/unknown         | 1391 | 8h | Uncharacterised/Hypothetical/duf |
| NN2   | CDS | 1439593 | 1439943 | + | uncharacterised/unknown         | 350  | 8h | Uncharacterised/Hypothetical/duf |
| NN2   | CDS | 1862134 | 1863021 | - | uncharacterised/unknown         | 887  | 8h | Uncharacterised/Hypothetical/duf |
| NN2   | CDS | 1949427 | 1950077 | - | uncharacterised/unknown         | 650  | 8h | Uncharacterised/Hypothetical/duf |
| NN2   | CDS | 2588780 | 2588869 | + | uncharacterised/unknown         | 89   | 8h | Uncharacterised/Hypothetical/duf |
| NN2   | CDS | 2588888 | 2589064 | - | uncharacterised/unknown         | 176  | 8h | Uncharacterised/Hypothetical/duf |
| NN2   | CDS | 2601326 | 2601883 | + | uncharacterised/unknown         | 557  | 8h | Uncharacterised/Hypothetical/duf |
| NN2   | CDS | 2828437 | 2830773 | - | uncharacterised/unknown         | 2336 | 8h | Uncharacterised/Hypothetical/duf |
| NN2   | CDS | 2857837 | 2858151 | - | uncharacterised/unknown         | 314  | 8h | Uncharacterised/Hypothetical/duf |
| NN2   | CDS | 2871217 | 2872419 | - | uncharacterised/unknown         | 1202 | 8h | Uncharacterised/Hypothetical/duf |
| NN2   | CDS | 3314674 | 3315270 | - | uncharacterised/unknown         | 596  | 8h | Uncharacterised/Hypothetical/duf |
| NN2   | CDS | 3343318 | 3344277 | + | uncharacterised/unknown         | 959  | 8h | Uncharacterised/Hypothetical/duf |
| NN2   | CDS | 3664472 | 3665611 | + | uncharacterised/unknown         | 1139 | 8h | Uncharacterised/Hypothetical/duf |

|     |     |         |         |   |                         |      |    |                                  |
|-----|-----|---------|---------|---|-------------------------|------|----|----------------------------------|
| NN2 | CDS | 3707045 | 3707581 | + | uncharacterised/unknown | 536  | 8h | Uncharacterised/Hypothetical/duf |
| NN2 | CDS | 3771482 | 3771757 | + | uncharacterised/unknown | 275  | 8h | Uncharacterised/Hypothetical/duf |
| NN2 | CDS | 3786567 | 3786794 | + | uncharacterised/unknown | 227  | 8h | Uncharacterised/Hypothetical/duf |
| NN2 | CDS | 3790645 | 3791520 | + | uncharacterised/unknown | 875  | 8h | Uncharacterised/Hypothetical/duf |
| NN2 | CDS | 4699036 | 4699257 | - | uncharacterised/unknown | 221  | 8h | Uncharacterised/Hypothetical/duf |
| NN2 | CDS | 4699296 | 4700297 | - | uncharacterised/unknown | 1001 | 8h | Uncharacterised/Hypothetical/duf |
| NN2 | CDS | 4715348 | 4716859 | + | uncharacterised/unknown | 1511 | 8h | Uncharacterised/Hypothetical/duf |
| NN2 | CDS | 4717624 | 4717974 | + | uncharacterised/unknown | 350  | 8h | Uncharacterised/Hypothetical/duf |
| NN2 | CDS | 4718305 | 4720224 | + | uncharacterised/unknown | 1919 | 8h | Uncharacterised/Hypothetical/duf |
| NN2 | CDS | 4923341 | 4924714 | + | uncharacterised/unknown | 1373 | 8h | Uncharacterised/Hypothetical/duf |
| NN2 | CDS | 4942236 | 4942670 | + | uncharacterised/unknown | 434  | 8h | Uncharacterised/Hypothetical/duf |
| NN2 | CDS | 5044484 | 5045722 | + | uncharacterised/unknown | 1238 | 8h | Uncharacterised/Hypothetical/duf |
| NN2 | CDS | 5067115 | 5067864 | + | uncharacterised/unknown | 749  | 8h | Uncharacterised/Hypothetical/duf |
| NN2 | CDS | 5584207 | 5584887 | + | uncharacterised/unknown | 680  | 8h | Uncharacterised/Hypothetical/duf |
| NN2 | CDS | 5590722 | 5592053 | + | uncharacterised/unknown | 1331 | 8h | Uncharacterised/Hypothetical/duf |
| NN2 | CDS | 5600734 | 5602623 | + | uncharacterised/unknown | 1889 | 8h | Uncharacterised/Hypothetical/duf |
| NN2 | CDS | 5606105 | 5606869 | - | uncharacterised/unknown | 764  | 8h | Uncharacterised/Hypothetical/duf |
| NN2 | CDS | 5643533 | 5643730 | + | uncharacterised/unknown | 197  | 8h | Uncharacterised/Hypothetical/duf |
| NN2 | CDS | 5669304 | 5670809 | + | uncharacterised/unknown | 1505 | 8h | Uncharacterised/Hypothetical/duf |
| NN2 | CDS | 5671230 | 5674172 | + | uncharacterised/unknown | 2942 | 8h | Uncharacterised/Hypothetical/duf |
| NN2 | CDS | 5696313 | 5698331 | + | uncharacterised/unknown | 2018 | 8h | Uncharacterised/Hypothetical/duf |
| NN2 | CDS | 5700636 | 5702555 | + | uncharacterised/unknown | 1919 | 8h | Uncharacterised/Hypothetical/duf |
| NN2 | CDS | 5832998 | 5833513 | + | uncharacterised/unknown | 515  | 8h | Uncharacterised/Hypothetical/duf |
| NN2 | CDS | 5915476 | 5916363 | - | uncharacterised/unknown | 887  | 8h | Uncharacterised/Hypothetical/duf |
| NN2 | CDS | 5997822 | 5998388 | - | uncharacterised/unknown | 566  | 8h | Uncharacterised/Hypothetical/duf |
| NN2 | CDS | 6102890 | 6103297 | - | uncharacterised/unknown | 407  | 8h | Uncharacterised/Hypothetical/duf |
| NN2 | CDS | 6330444 | 6331373 | - | uncharacterised/unknown | 929  | 8h | Uncharacterised/Hypothetical/duf |

|       |      |         |         |   |                         |      |    |                                  |
|-------|------|---------|---------|---|-------------------------|------|----|----------------------------------|
| NN2   | CDS  | 6397721 | 6398125 | + | uncharacterised/unknown | 404  | 8h | Uncharacterised/Hypothetical/duf |
| NN2   | CDS  | 6476182 | 6476625 | - | uncharacterised/unknown | 443  | 8h | Uncharacterised/Hypothetical/duf |
| NN2   | CDS  | 6524219 | 6524677 | + | uncharacterised/unknown | 458  | 8h | Uncharacterised/Hypothetical/duf |
| NN2   | CDS  | 6566045 | 6569314 | - | uncharacterised/unknown | 3269 | 8h | Uncharacterised/Hypothetical/duf |
| NN2   | CDS  | 6664938 | 6665321 | - | uncharacterised/unknown | 383  | 8h | Uncharacterised/Hypothetical/duf |
| NN2   | CDS  | 6667694 | 6669034 | + | uncharacterised/unknown | 1340 | 8h | Uncharacterised/Hypothetical/duf |
| NN2   | CDS  | 6800889 | 6802637 | + | uncharacterised/unknown | 1748 | 8h | Uncharacterised/Hypothetical/duf |
| NN2   | CDS  | 6851349 | 6852092 | + | uncharacterised/unknown | 743  | 8h | Uncharacterised/Hypothetical/duf |
| NN2   | exon | 4810150 | 4810659 | + | uncharacterised/unknown | 509  | 8h | Uncharacterised/Hypothetical/duf |
| NN2   | exon | 5976006 | 5976084 | + | uncharacterised/unknown | 78   | 8h | Uncharacterised/Hypothetical/duf |
| SG17M | CDS  | 695968  | 697314  | + | uncharacterised/unknown | 1346 | 8h | Uncharacterised/Hypothetical/duf |
| SG17M | CDS  | 930841  | 931902  | - | uncharacterised/unknown | 1061 | 8h | Uncharacterised/Hypothetical/duf |
| SG17M | CDS  | 945784  | 945954  | - | uncharacterised/unknown | 170  | 8h | Uncharacterised/Hypothetical/duf |
| SG17M | CDS  | 958736  | 958876  | - | uncharacterised/unknown | 140  | 8h | Uncharacterised/Hypothetical/duf |
| SG17M | CDS  | 991325  | 991702  | - | uncharacterised/unknown | 377  | 8h | Uncharacterised/Hypothetical/duf |
| SG17M | exon | 993459  | 993651  | - | uncharacterised/unknown | 192  | 8h | Uncharacterised/Hypothetical/duf |
| SG17M | CDS  | 1275937 | 1276233 | + | uncharacterised/unknown | 296  | 8h | Uncharacterised/Hypothetical/duf |
| SG17M | CDS  | 1549776 | 1552700 | + | uncharacterised/unknown | 2924 | 8h | Uncharacterised/Hypothetical/duf |
| SG17M | CDS  | 1823566 | 1824393 | - | uncharacterised/unknown | 827  | 8h | Uncharacterised/Hypothetical/duf |
| SG17M | CDS  | 1986860 | 1987258 | - | uncharacterised/unknown | 398  | 8h | Uncharacterised/Hypothetical/duf |
| SG17M | CDS  | 1987303 | 1987887 | - | uncharacterised/unknown | 584  | 8h | Uncharacterised/Hypothetical/duf |
| SG17M | CDS  | 2218623 | 2219102 | - | uncharacterised/unknown | 479  | 8h | Uncharacterised/Hypothetical/duf |
| SG17M | CDS  | 2703596 | 2704345 | - | uncharacterised/unknown | 749  | 8h | Uncharacterised/Hypothetical/duf |
| SG17M | CDS  | 2726147 | 2726860 | - | uncharacterised/unknown | 713  | 8h | Uncharacterised/Hypothetical/duf |
| SG17M | CDS  | 2812310 | 2812399 | + | uncharacterised/unknown | 89   | 8h | Uncharacterised/Hypothetical/duf |
| SG17M | CDS  | 2824856 | 2825413 | + | uncharacterised/unknown | 557  | 8h | Uncharacterised/Hypothetical/duf |
| SG17M | CDS  | 2854181 | 2854369 | - | uncharacterised/unknown | 188  | 8h | Uncharacterised/Hypothetical/duf |

|       |      |         |         |   |                                 |      |    |                                  |
|-------|------|---------|---------|---|---------------------------------|------|----|----------------------------------|
| SG17M | CDS  | 2854416 | 2855336 | - | uncharacterised/unknown         | 920  | 8h | Uncharacterised/Hypothetical/duf |
| SG17M | CDS  | 3108185 | 3108934 | - | uncharacterised/unknown         | 749  | 8h | Uncharacterised/Hypothetical/duf |
| SG17M | CDS  | 3205345 | 3205569 | - | uncharacterised/unknown         | 224  | 8h | Uncharacterised/Hypothetical/duf |
| SG17M | CDS  | 3293239 | 3294492 | - | uncharacterised/unknown         | 1253 | 8h | Uncharacterised/Hypothetical/duf |
| SG17M | CDS  | 3358927 | 3359631 | - | uncharacterised/unknown         | 704  | 8h | Uncharacterised/Hypothetical/duf |
| SG17M | CDS  | 3676771 | 3677406 | - | uncharacterised/unknown         | 635  | 8h | Uncharacterised/Hypothetical/duf |
| SG17M | CDS  | 4519545 | 4520306 | - | uncharacterised/unknown         | 761  | 8h | Uncharacterised/Hypothetical/duf |
| SG17M | CDS  | 4521576 | 4521890 | - | uncharacterised/unknown         | 314  | 8h | Uncharacterised/Hypothetical/duf |
| SG17M | CDS  | 5210027 | 5210218 | + | uncharacterised/unknown         | 191  | 8h | Uncharacterised/Hypothetical/duf |
| SG17M | CDS  | 5232541 | 5232900 | - | uncharacterised/unknown         | 359  | 8h | Uncharacterised/Hypothetical/duf |
| SG17M | exon | 5267608 | 5268117 | + | uncharacterised/unknown         | 509  | 8h | Uncharacterised/Hypothetical/duf |
| SG17M | CDS  | 5837406 | 5839295 | + | uncharacterised/unknown         | 1889 | 8h | Uncharacterised/Hypothetical/duf |
| SG17M | CDS  | 5878019 | 5879128 | + | uncharacterised/unknown         | 1109 | 8h | Uncharacterised/Hypothetical/duf |
| SG17M | CDS  | 6265598 | 6265729 | + | uncharacterised/unknown         | 131  | 8h | Uncharacterised/Hypothetical/duf |
| SG17M | CDS  | 6487314 | 6488129 | + | uncharacterised/unknown         | 815  | 8h | Uncharacterised/Hypothetical/duf |
| SG17M | CDS  | 6706599 | 6706928 | + | uncharacterised/unknown         | 329  | 8h | Uncharacterised/Hypothetical/duf |
| SG17M | CDS  | 3206152 | 3206814 | - | uncharacterised/unknown         | 662  | 8h | Uncharacterised/Hypothetical/duf |
| NN2   | CDS  | 6553299 | 6553778 | + | TIGR02444_family_protein        | 479  | 8h | Uncharacterised/Hypothetical/duf |
| SG17M | CDS  | 6753347 | 6753826 | + | TIGR02444_family_protein        | 479  | 8h | Uncharacterised/Hypothetical/duf |
| SG17M | CDS  | 3083353 | 3085218 | - | relaxase                        | 1865 | 8h | Uncharacterised/Hypothetical/duf |
| SG17M | CDS  | 4692255 | 4692464 | + | regulatory protein              | 209  | 8h | Uncharacterised/Hypothetical/duf |
| SG17M | CDS  | 3209942 | 3211144 | - | putative integrase              | 1202 | 8h | Uncharacterised/Hypothetical/duf |
| SG17M | CDS  | 5368367 | 5370688 | + | putative helicase               | 2321 | 8h | Uncharacterised/Hypothetical/duf |
| SG17M | CDS  | 2066722 | 2068908 | - | pnpla domain-containing protein | 2186 | 8h | Uncharacterised/Hypothetical/duf |
| SG17M | CDS  | 6530493 | 6531422 | - | phasin family protein           | 929  | 8h | Uncharacterised/Hypothetical/duf |
| SG17M | CDS  | 2167493 | 2168239 | - | pbbp_domain-containing_protein  | 746  | 8h | Uncharacterised/Hypothetical/duf |
| SG17M | CDS  | 5347617 | 5348135 | + | paar_domain-containing_protein  | 518  | 8h | Uncharacterised/Hypothetical/duf |

|       |     |         |         |   |                                            |      |    |                                  |
|-------|-----|---------|---------|---|--------------------------------------------|------|----|----------------------------------|
| SG17M | CDS | 5145851 | 5146849 | + | mvfR                                       | 998  | 8h | Uncharacterised/Hypothetical/duf |
| SG17M | CDS | 5357742 | 5358989 | + | mfs domain-containing protein              | 1247 | 8h | Uncharacterised/Hypothetical/duf |
| SG17M | CDS | 2536936 | 2537193 | - | membrane protein                           | 257  | 8h | Uncharacterised/Hypothetical/duf |
| NN2   | CDS | 2022249 | 2022626 | + | hypothetical_protein                       | 377  | 8h | Uncharacterised/Hypothetical/duf |
| SG17M | CDS | 4215965 | 4216840 | + | hydrolase-4 domain-containing protein      | 875  | 8h | Uncharacterised/Hypothetical/duf |
| SG17M | CDS | 3695735 | 3697054 | - | gluconate_2-<br>dehydrogenase_cytochrome_c | 1319 | 8h | Uncharacterised/Hypothetical/duf |
| SG17M | CDS | 2894815 | 2895210 | + | gfa_family_protein                         | 395  | 8h | Uncharacterised/Hypothetical/duf |
| SG17M | CDS | 5568511 | 5569512 | + | flippase-like domain-containing protein    | 1001 | 8h | Uncharacterised/Hypothetical/duf |
| NN2   | CDS | 5428409 | 5428870 | + | duf721                                     | 461  | 8h | Uncharacterised/Hypothetical/duf |
| SG17M | CDS | 5244051 | 5244566 | + | duf4124                                    | 515  | 8h | Uncharacterised/Hypothetical/duf |
| NN2   | CDS | 6400617 | 6401138 | + | duf4124                                    | 521  | 8h | Uncharacterised/Hypothetical/duf |
| SG17M | CDS | 6867744 | 6869084 | + | duf3971                                    | 1340 | 8h | Uncharacterised/Hypothetical/duf |
| NN2   | CDS | 5642684 | 5643163 | + | duf3577                                    | 479  | 8h | Uncharacterised/Hypothetical/duf |
| SG17M | CDS | 4211887 | 4212114 | + | duf2970                                    | 227  | 8h | Uncharacterised/Hypothetical/duf |
| SG17M | CDS | 354378  | 354587  | - | duf2909                                    | 209  | 8h | Uncharacterised/Hypothetical/duf |
| SG17M | CDS | 2132796 | 2134931 | + | duf2235                                    | 2135 | 8h | Uncharacterised/Hypothetical/duf |
| SG17M | CDS | 5018993 | 5019214 | + | duf2132                                    | 221  | 8h | Uncharacterised/Hypothetical/duf |
| NN2   | CDS | 4561534 | 4561755 | + | duf2132                                    | 221  | 8h | Uncharacterised/Hypothetical/duf |
| SG17M | CDS | 2051346 | 2051957 | + | duf2064                                    | 611  | 8h | Uncharacterised/Hypothetical/duf |
| SG17M | CDS | 954693  | 958307  | + | duf1983                                    | 3614 | 8h | Uncharacterised/Hypothetical/duf |
| SG17M | CDS | 96110   | 96313   | + | duf1127                                    | 203  | 8h | Uncharacterised/Hypothetical/duf |
| NN2   | CDS | 6774383 | 6774586 | + | duf1127                                    | 203  | 8h | Uncharacterised/Hypothetical/duf |
| SG17M | CDS | 5729061 | 5729585 | + | duf0307                                    | 524  | 8h | Uncharacterised/Hypothetical/duf |
| NN2   | CDS | 4348049 | 4348498 | - | duf0260                                    | 449  | 8h | Uncharacterised/Hypothetical/duf |
| SG17M | CDS | 5888062 | 5888718 | + | dsba-like thioredoxin domain protein       | 656  | 8h | Uncharacterised/Hypothetical/duf |
| SG17M | CDS | 4689426 | 4691378 | + | diguanylate cyclase/phosphodiesterase      | 1952 | 8h | Uncharacterised/Hypothetical/duf |
| NN2   | CDS | 3179899 | 3180831 | - | scrK_1                                     | 932  | 8h | Uncharacterised/Hypothetical/duf |

|       |     |         |         |   |                                   |      |    |                                  |
|-------|-----|---------|---------|---|-----------------------------------|------|----|----------------------------------|
| NN2   | CDS | 6525815 | 6528565 | - | rbbA_1                            | 2750 | 8h | Uncharacterised/Hypothetical/duf |
| SG17M | CDS | 5610765 | 5611817 | + | nemA_6                            | 1052 | 8h | Uncharacterised/Hypothetical/duf |
| NN2   | CDS | 5374256 | 5375308 | + | nemA_3                            | 1052 | 8h | Uncharacterised/Hypothetical/duf |
| SG17M | CDS | 4817688 | 4818620 | - | ghrA_2                            | 932  | 8h | Uncharacterised/Hypothetical/duf |
| NN2   | CDS | 4349901 | 4350833 | - | ghrA_1                            | 932  | 8h | Uncharacterised/Hypothetical/duf |
| SG17M | CDS | 2776676 | 2777914 | - | cpg2_2                            | 1238 | 8h | Uncharacterised/Hypothetical/duf |
| NN2   | CDS | 1443424 | 1445130 | + | urea amidohydrolase subunit_alpha | 1706 | 4h | urea catabolic process           |
| SG17M | CDS | 1668139 | 1669845 | + | urea amidohydrolase subunit alpha | 1706 | 4h | urea catabolic process           |
| NN2   | CDS | 6359154 | 6361526 | - | vgrG1_7                           | 2372 | 8h | Virulence                        |
| NN2   | CDS | 4689343 | 4689945 | - | phnB_1                            | 602  | 8h | Virulence                        |
